1 Functional metagenomics using *Pseudomonas putida* expands the known diversity of  
2 polyhydroxyalkanoate synthases and enables the production of novel polyhydroxyalkanoate  
3 copolymers

4

5 Jijun Cheng and Trevor C. Charles\*

6

7 Department of Biology and Centre for Bioengineering and Biotechnology, University of Waterloo,  
8 Waterloo, Ontario, Canada N2L 3G1

9

10 \*Corresponding author:

11 Dr. Trevor C. Charles

12 Department of Biology, University of Waterloo, Waterloo, Ontario, Canada N2L 3G1.

13 E-mail: [tcharles@uwaterloo.ca](mailto:tcharles@uwaterloo.ca)

14

15 Email addresses: Jijun Cheng ([j37cheng@uwaterloo.ca](mailto:j37cheng@uwaterloo.ca)), Trevor C. Charles

16 ([trevor.charles@uwaterloo.ca](mailto:trevor.charles@uwaterloo.ca))

## 17 **Highlights**

- 18 • A functional metagenomic screen was developed for isolation of PHA synthesis genes using  
19 *Pseudomonas putida*
- 20 • Use of the screen resulted in a collection of novel PHA synthesis genes that directed the  
21 production of a variety of different polyhydroxyalkanoates, including SCL-MCL copolymers
- 22 • DNA sequence analysis of the cloned DNA suggests some basis for the polyhydroxyalkanoate  
23 diversity based on key amino acid residues in PHA synthase enzymes
- 24 • We have demonstrated the potential for using metagenome-derived clones for production of a  
25 variety of PHAs of possible industrial utility.

## 26 **Abstract**

27 Bacterially produced biodegradable polyhydroxyalkanoates with versatile properties can be achieved  
28 using different PHA synthase enzymes. This work aims to expand the diversity of known PHA  
29 synthases via functional metagenomics, and demonstrates the use of these novel enzymes in PHA  
30 production. Complementation of a PHA synthesis deficient *Pseudomonas putida* strain with a soil  
31 metagenomic cosmid library retrieved 27 clones expressing either Class I, Class II or unclassified  
32 PHA synthases, and many did not have close sequence matches to known PHA synthases. The  
33 composition of PHA produced by these clones was dependent on both the supplied growth substrates  
34 and the nature of the PHA synthase, with various combinations of SCL- and MCL-PHA. These data  
35 demonstrate the ability to isolate diverse genes for PHA synthesis by functional metagenomics, and  
36 their use for the production of a variety of PHA polymer and copolymer mixtures.

## 37 **Keywords:**

38 Functional metagenomics; soil metagenomic library; polyhydroxyalkanoate (PHA); bioplastics;  
39 polyhydroxyalkanoate synthase; *Pseudomonas putida*; *Sinorhizobium meliloti*

40

## 41 **1. Introduction**

42 Polyhydroxyalkanoates (PHAs) are natural polyesters biosynthesized by a variety of bacteria  
43 under unbalanced growth conditions. They serve as reserves of carbon and reducing power and aid  
44 in survival during starvation or stress conditions (Verlinden et al., 2007). These biodegradable and  
45 environmentally friendly polymers can be used as alternative materials to conventional  
46 petrochemical-based plastics. PHAs are classified into short-chain-length (SCL, C3-C5) and  
47 medium-chain-length (MCL,  $\geq$ C6), and copolymers (SCL + MCL) based on the number of carbon  
48 atoms per monomer. MCL-PHA is generally more useful than SCL-PHA due to it being less brittle  
49 and more flexible. To produce PHA with versatile properties cost-effectively, strategies have  
50 involved mining new PHA synthase enzymes (PhaC), engineering PhaC proteins and modifying the  
51 metabolic pathways of the production strains (Cheema et al., 2012; Keshavarz and Roy, 2010; Meng  
52 et al., 2014; Park et al., 2012; Schallmeyer et al., 2011; Tripathi et al., 2013).

53 PHA molecules consist of over 150 possible constituent monomers of hydroxyl fatty acids  
54 (Meng et al., 2014). PHA synthase enzymes catalyze the joining of the hydroxyl group of one  
55 monomer with the carboxyl group of another by an ester bond to form PHA polymers. The  
56 monomeric composition of PHA is determined primarily by PhaC, although the available carbon  
57 source and metabolic pathways also influence the properties of PHA (Verlinden et al., 2007). PhaC  
58 proteins are grouped into four classes based on amino acid sequence, substrate specificity and  
59 subunit composition (Rehm, 2003). Class I and II PhaC consist of one subunit (PhaC), but those in  
60 Class III and IV are composed of two subunits (PhaC+PhaE and PhaC+PhaR, respectively). Class I  
61 and IV PhaCs synthesize SCL-PHA whereas Class II polymerize MCL-PHA. Class III PhaCs can  
62 synthesize both SCL and MCL monomers.

63           The key Class I PHA synthesis pathway genes include *phaC* (or *phbC*), *phaA* (or *phbA*) and  
64 *phaB* (or *phbB*). The three genes are often, but not always, clustered in a single operon. The  
65 acetoacetyl-CoA reductase (EC 2.3.1.9) encoded by the *phaA* and  $\beta$ -ketothiolase (EC 1.1.1.36)  
66 encoded by the *phaB* convert acetyl-CoA to (R)-3-hydroxybutyryl-CoA (3HB-CoA) through  
67 acetoacetyl-CoA. The Class-I PhaC (EC 2.3.1.-) then polymerizes 3HB-CoA into  
68 polyhydroxybutyrate (PHB) (Rehm, 2003). The Class II *pha* cluster is well conserved in  
69 *Pseudomonas* and consists of two PHA synthase genes (*phaC1* and *phaC2*) flanking a PHA  
70 depolymerase gene (*phaZ*), and *phaD* encoding a transcriptional activator of *pha* genes. Phasin-  
71 encoding *phaF* and *phaI* gene are transcribed divergently to other *pha* genes. MCL monomers ((R)-  
72 3-hydroxylacyl-CoA) are derived from  $\beta$ -oxidation of fatty acids or fatty acid *de novo* synthesis from  
73 unrelated carbon sources (Tortajada et al., 2013).

74           Traditional culture-based strategies for obtaining new biocatalysts are limited by the inability  
75 to cultivate the majority of environmental microbes. While sequence-based metagenomics can  
76 identify genes homologous to those present in available sequence databases, it is difficult to reliably  
77 predict the function of truly new genes through homology-based analysis. In contrast, functional  
78 metagenomics involves the construction of gene libraries from microbial community genomic DNA  
79 and functional screening for novel enzymes of interest or potential industrial applications (Simon  
80 and Daniel, 2011). Functional metagenomics has the potential to identify truly novel sequences for a  
81 given function.

82           In previous work, functional metagenomics was used to isolate new Class I PhaC from soil  
83 metagenomic clones by Nile red staining and phenotypic screening in  *$\alpha$ -Proteobacteria*  
84 *Sinorhizobium meliloti* (Schallmeyer et al., 2011). In another study, *phaC* genes encoding both Class I  
85 and II PhaC proteins were PCR amplified from oil-contaminated soil library clones (Cheema et al.,

86 2012). One of the isolated genes produced PHA copolymer when expressed in *Pseudomonas putida*.  
87 Moreover, partial *phaC* genes were also obtained from metagenomic DNA via direct PCR  
88 amplification (Foong et al., 2014; Pärnänen et al., 2015; Tai et al., 2015). Building on these previous  
89 studies, we constructed a PHA<sup>-</sup> strain of *P. putida* KT2440 to use as a surrogate host and  
90 functionally identified *phaC* genes after screening millions of agricultural wheat soil metagenomic  
91 clones. A total of 27 PHA<sup>+</sup> clones were obtained. Accumulation and monomer composition of PHA  
92 directed by seven of these clones were further examined.

93

## 94 **2. Methods**

### 95 **2.1. Bacterial strains, plasmids, cosmids and growth conditions**

96 Bacterial strains, plasmids and cosmids are listed in Table 1. *E. coli* strains were grown at  
97 37°C in LB (Lennox) medium (1% tryptone (w/v), 0.5% yeast extract (w/v), and 0.5% NaCl (w/v),  
98 pH 7). *Pseudomonas* strains were grown at 30°C in LB or 0.1N M63 minimal medium (Escapa et al.,  
99 2011) supplemented with 0.5% sodium octanoate (w/v), 0.5% nonanoic acid (v/v) or 1% gluconic  
100 acid (w/v). *S. meliloti* was grown in LB or YM medium (Schallmey et al., 2011). Antibiotics were  
101 used at the following concentrations: streptomycin, 200 µg/ml for *S. meliloti* and 100 µg/ml for *E.*  
102 *coli*; kanamycin, 100 µg/ml for *Pseudomonas* and 50 µg/ml for *E. coli*; neomycin, 200 µg/ml;  
103 rifampicin, 100 µg/ml; gentamicin, 10 µg/ml for *E. coli* and 100 for *P. putida*; and tetracycline 20  
104 µg/ml for *E. coli* or 40 µg/ml for *P. putida*.

105

### 106 **2.2. Construction of PHA<sup>-</sup> strain PpUW2**

107 DNA oligonucleotides are listed in Table 2. A Rif<sup>R</sup> spontaneous mutant PpUW1 of *P. putida*  
108 KT2440 was generated by plating a culture of strain KT2440 on a LB Rif plate, followed by single

109 colony purification. To construct the PHA deficient strain PpUW2 (*phaCIZC2*) of *P. putida* PpUW1,  
110 a 943-bp DNA fragment containing 5'-*phaC1* region (766 bp) was PCR amplified using *P. putida*  
111 KT2440 genomic DNA as a template and primer pair JC161-JC162, digested with HindIII-BamHI  
112 and then cloned into the same sites in pJQ200-SK (Quandt and Hynes, 1993), yielding plasmid  
113 pJC63. Another 876-bp DNA fragment containing the 3'-*phaC2* gene (120 bp) was PCR amplified  
114 using primers JC163-JC164, digested with BamHI-SalI and then cloned into the same sites in pJC63  
115 to obtain plasmid pJC69. An omega-Km cassette was obtained from pHP45Ω-Km (Fellay et al.,  
116 1987) by BamHI digestion and then inserted into the same site in pJC69 to obtain pJC71. Plasmid  
117 pJC71 was then conjugated into *P. putida* PpUW1 in a triparental mating using helper plasmid  
118 pRK600. Single cross-over recombination of pJC71 into the *P. putida* chromosome was selected  
119 with Rif and Gm. A double cross-over event was achieved by growing a single Rif<sup>R</sup> Gm<sup>R</sup> colony  
120 overnight in LB, making serial dilutions and then spreading on LB Km with 5% sucrose. The  
121 resulting PHA<sup>-</sup> strain PpUW2 was verified by examining Gm sensitivity (lost plasmid backbone) and  
122 absence of PHA production in LB supplemented with 0.5% octanoate (w/v), and was further  
123 confirmed by PCR amplification analysis.

124

### 125 **2.3. Phenotypic screening for *phaC* genes from metagenomic library clones**

126 Construction of the metagenomic DNA library (11AW) of agricultural wheat soil was  
127 described previously (Cheng et al., 2014). The 11AW library contains  $9 \times 10^6$  clones hosted in *E.*  
128 *coli* HB101. The pooled library clones (0.5 ml of 300 ml stock) were conjugated *en masse* into *P.*  
129 *putida* PpUW2 (PHA<sup>-</sup>) with the helper plasmid pRK600. Mating mixture was diluted serially with  
130 0.85% NaCl and ~20,000 transconjugants recovered on each LB Tc plate (15 mm × 150 mm)  
131 supplemented with 0.5% Na octanoate (w/v). The plates were incubated at 30°C for 24 h and then

132 kept at 22°C for 2-6 days. Potential PHA<sup>+</sup> clones of opaque white colour were streak purified on the  
133 LB octanoate plates, and verified on 0.1N M63 minimal medium plates (Escapa et al., 2011)  
134 supplemented with 0.5% octanoate (w/v) and Nile red (0.5 µg/ml). PHA<sup>+</sup> cosmids were transferred  
135 from *P. putida* to *E. coli* DH5α(Rif<sup>R</sup>), mobilized by pRK600. The cosmid DNA was isolated from *E.*  
136 *coli* strains using a GeneJET Plasmid Miniprep Kit (Thermo Scientific), digested by EcoRI-HindIII-  
137 BamHI (Thermo Scientific), and then resolved on 1% TAE agarose gels. Cosmids with distinct  
138 electrophoretic patterns were conjugated back to *P. putida* PpUW2 (PHA<sup>-</sup>) to confirm their PHA<sup>+</sup>  
139 phenotype.

140

#### 141 **2.4. Complementation of *S. meliloti* (*phbC*)**

142 11AW cosmid DNA encoding Class I and II *phaC* genes was introduced into *S. meliloti*  
143 Rm11476 (Schallmeyer et al., 2011) via triparental conjugation. Transconjugants were selected on LB  
144 SmNmTc plates, and then streaked on YM plates containing Nile red (Schallmeyer et al., 2011) for  
145 visualizing PHB production.

146

#### 147 **2.5. DNA sequencing and bioinformatics**

148 KOD Xtreme DNA polymerase (Novagen) was used for all PCR. Primers are listed in Table  
149 2. PCR reactions consisted of one cycle of 94°C for 5 min, 30 cycles of 94°C for 30 s, 53°C for 30 s  
150 and 68°C for 30 s, and final extension at 68°C for 10 min. The internal regions of *phaC* genes were  
151 PCR amplified from PHA<sup>+</sup> cosmids using primer phaCF1 and phaCR4 (Sheu et al., 2000). When no  
152 PCR product of correct size was obtained, a semi-nested PCR was performed with the primers  
153 phaCF2 and phaCR4 as described previously (Sheu et al., 2000). PCR products were resolved on 2%  
154 agarose gels, isolated from the gels using EZ-10 Spin Column DNA Gel Extraction Kit (Bio Basic),

155 and then cloned into pJET1.2 vector (Thermo Scientific). Sequences of the cloned partial *phaC*  
156 genes were obtained using pJET1.2 sequencing primers (Table 2).

157 End sequences of PHA<sup>+</sup> cosmid DNA were obtained by Sanger sequencing using universal  
158 M13F and M13R primers. For high throughput sequencing, 68 cosmids of 11AW PHA<sup>+</sup> clones and  
159 28 cosmids from other research projects were grouped into 24 pools. Tagmentation of pooled cosmid  
160 DNA, PCR amplification and clean-up, and library normalization were performed with the Nextera  
161 XT DNA library and index kits (Illumina), according to the supplier's recommendation. The library  
162 was sequenced using MiSeq 500-cycle version 2 reagent (Illumina). DNA sequences were  
163 assembled using SPAdes Genome Assembler 3.5.0 (BaseSpace, Illumina). Cosmid clones were  
164 identified based on the available Sanger end sequences and ORFs were annotated with  
165 MetaGeneMark (Zhu et al., 2010). Predicted protein sequences were analyzed by BLAST against the  
166 non-redundant protein databases (NCBI). Multiple-sequence alignment was performed using  
167 MUSCLE (Edgar, 2004). Phylogenetic analysis was performed using MEGA6 (Tamura et al., 2013).  
168 Origin of cloned metagenomic DNA was predicted by PhyloPythia (Patil et al., 2012).

169

## 170 **2.6. Cloning of *phaC1<sub>Pp</sub>* gene of *P. putida* KT2440**

171 To construct a *phaC* expression cosmid for a positive control, the *phaC1<sub>Pp</sub>* gene (*Pp\_5003*)  
172 of *P. putida* KT2440 was PCR amplified using primers JC159-JC160 and cloned into the HindIII  
173 and BamHI sites in the broad-host-range vector pRK7813 (Cheng et al., 2014), to obtain construct  
174 pJC67 (*Plac::phaC1<sub>Pp</sub>*). A stop codon (TGA) for terminating the translation of *lacZα* upstream of the  
175 *phaC1<sub>Pp</sub>*, and a ribosome-binding site (AGGAG) were incorporated into the primer JC159 (Table 2).

176

## 177 **2.7. Subcloning *phaC* genes of 11AW metagenomic clone 16**



178 The Class II *phaC1<sub>16</sub>* gene of 11AW clone 16 was PCR amplified with oligos JC301 and  
179 JC302, and cloned into the HindIII-EcoRI sites in pRK7813 to obtain pJC123. The *phaC2<sub>16</sub>* was  
180 amplified using primers JC337 and JC334, and inserted into the EcoRI site in pJC123, yielding  
181 pJC157. The orientation of cloned *phaC2<sub>16</sub>* was verified by restriction enzyme mapping. The  
182 *phaC2<sub>16</sub>* gene was also obtained by PCR using oligos JC333 and JC334, and cloned into the HindIII-  
183 EcoRI sites in pRK7813 to yield pJC159. A stop codon (TGA) for terminating the translation of  
184 *lacZα* gene and ribosome-binding sites were added in primers JC333 and JC337. The cloned *phaC*  
185 genes were verified by DNA sequencing.

186

## 187 **2.8. Estimation of PHA production by fluorescent spectrometry**

188 A modification of the previously described method (Wu et al., 2003) was used. *S. meliloti*  
189 cells (2.5%, v/v) were added to YM medium. All cultures were incubated at 30°C and 200 rpm for  
190 48-72 h. The OD<sub>600</sub> values of 200 µl cultures were measured in 96-well microtiter plates with the  
191 Multiskan Spectrum spectrophotometer (Thermo Labsystems). Samples (180 µl) were stained with  
192 20 µl of Nile red (2.5 µg/ml) in the dark for 1 h. Fluorescent intensity was measured at excitation  
193 (485 nm) and emission (595 nm) with the FilterMax F5 Multi-mode microplate reader (Molecular  
194 Devices). PHA content was calculated based on the equation (fluorescent intensity/OD<sub>600</sub>×0.9).

195

## 196 **2.9. PHA production, extraction and characterization**

197 *P. putida* PpUW1 (PHA<sup>+</sup>) or PpUW2 (PHA<sup>-</sup>) carrying PHA<sup>+</sup> clones were grown overnight in  
198 LB with or without Tc, washed once with 0.85% NaCl, and then subcultured (2%, v/v) in the 0.1N  
199 M63 medium with or without Tc, supplemented with 0.5% Na octanoate, 0.5% nonanoic acid or 1%  
200 gluconic acid. The cultures were grown at 30°C and at 200 rpm for 48 hrs. Cells were collected by

201 centrifugation at 20°C and at 9000 × g for 15 min, washed once with deionized water. Cell dry  
202 weight (CDW) was obtained after drying the cells at 95°C for 24 hr. For PHA methanolysis, cell  
203 pellet (~15 mg) was suspended in 2 ml of chloroform and 2 ml of methanol with 15% H<sub>2</sub>SO<sub>4</sub> (v/v),  
204 and incubated at 100°C for 5 h. After the reaction mixture was cooled down to 20°C, 1 ml of  
205 deionized water was added, and vortexed vigorously for 1 min. The chloroform phase was passed  
206 through a cotton plug in a Pasteur glass pipette to remove any cell debris. Methanolized sample (1  
207 µl) was analyzed with GC-MS (an Agilent 7975B GC equipped with Agilent 5975B inert XL EI/CI  
208 MSD and an HP-5MS capillary column). Oven temperature was run at initial 50°C for 5 min with a  
209 ramp of 20°C/min to 280°C, and then held for 10 min. The flow rate of Helium carrier gas was 1.2  
210 ml/min. Methylated PHA monomers were identified using the Agilent enhanced MSD chemstation  
211 (E.02.01.117). PHA standards were kindly provided by Dr. Bruce A. Ramsay (Polyferm Canada).

212

### 213 **3. Results**

#### 214 **3.1. Isolation of metagenomic clones for PHA production**

215 To employ *P. putida* as a surrogate host to isolate 11AW (agricultural wheat soil)  
216 metagenomic library clones encoding functional PhaC, it was first necessary to construct a PHA  
217 synthesis mutant. Expression of the contiguous three genes encoding PHA synthase PhaC1<sub>Pp</sub>  
218 (Pp\_5003), PHA depolymerase PhaZ<sub>Pp</sub> (Pp\_5004) and PHA synthase PhaC2<sub>Pp</sub> (Pp\_5005) in *P.*  
219 *putida* KT2440 Rif<sup>R</sup> derivative PpUW1 was disrupted by deletion of 3437-bp comprised of the 3'  
220 region (911 bp) of *phaC1<sub>Pp</sub>* (1677 bp), *phaZ<sub>Pp</sub>* and the 5' region (1560 bp) of *phaC2<sub>Pp</sub>* (1680 bp) and  
221 replacement with an omega-Km kanamycin resistance insert, resulting in the PHA<sup>-</sup> strain PpUW2.  
222 Transfer of the negative control cosmid vector pJC8 to *P. putida* PpUW2 did not result in detectable  
223 PHA production. However, introduction of pJC67 (*Plac::phaC1<sub>Pp</sub>*) *in trans* restored the PHA<sup>+</sup>

224 phenotype (Fig. 1). These data suggested that the strain PpUW2 could be used for screening of  
225 PhaC-encoding metagenomic clones. The 11AW library clones (Cheng et al., 2014) were transferred  
226 to *P. putida* PpUW2 via en masse triparental conjugation. Following selection of *P. putida* PpUW2  
227 transconjugants (~4 million) on LB Km Tc plates supplemented with 0.5% Na octanoate, we  
228 obtained 72 clones that exhibited greater opacity than the PpUW2 PHA<sup>-</sup> recipient strain. The PHA-  
229 producing phenotype of those clones was verified by visualizing the fluorescence of Nile red-stained  
230 PHA in 0.1N M63 minimal medium (Escapa et al., 2011) supplemented with Na octanoate as the  
231 sole carbon source (Fig. 1). Restriction digest of DNA from the 72 clones demonstrated 68 distinct  
232 restriction patterns, suggesting the presence of a broad diversity of DNA origin in those PHA<sup>+</sup> clones.  
233

### 234 **3.2. Identification of *phaC* genes encoding PHA synthases**

235 Internal regions (~500 bp) of the *phaC* genes of 18 distinct cosmid clones were initially  
236 obtained by PCR amplification using degenerate primers PhaCF1 and PhaCR4 (Sheu et al., 2000).  
237 For additional 4 clones, *phaC* fragments (PhaC<sub>3</sub>, PhaC<sub>7</sub>, PhaC<sub>10</sub>, and PhaC<sub>15</sub>) of ~400 bp were  
238 generated by nested-PCR using primer pair PhaCF2-PhaCR4 as described previously (Sheu et al.,  
239 2000). BLASTP analysis of the cloned gene products indicated that 13 PhaC proteins could be  
240 grouped into Class I while the other 9 were categorized as Class II PHA synthases.

241 To identify all *pha* genes on the isolated clones, DNA sequences were obtained by high  
242 throughput sequencing, and additional *pha* gene loci were identified in partially and fully assembled  
243 clones (Table 3; Supplementary 1). The identified PHA synthases could be classified into 3 groups  
244 based on amino acid sequences (Fig. 2). Class I *phaC* genes were annotated in 17 clones. The *phaC*  
245 and *phaAB* genes were adjacently located in 12 of these clones, whereas the *phaB* gene was located  
246 distantly downstream of *phaCA* genes in clone 25 and clone P1N3 (Supplementary 1). A *phaR* gene

247 was located immediately downstream of *phaCB* genes in partially assembled clone P11N2. The  
248 *phaC* and *phaB* genes flanked a *phaZ* gene in the partially assembled clone P2N8. The metagenomic  
249 DNA in these Class I clones was predicted to originate from *Gemmatimonas*,  $\alpha$ -*Proteobacteria*  
250 (*Sphingomonadaceae*),  $\beta$ -*Proteobacteria* (*Leptothrix*, *Rubrivivax*, *Janthinobacterium*) and  $\gamma$ -  
251 *Proteobacteria* (*Xanthomonadaceae*) (Table 3).

252 Class II PHA genes are commonly clustered with *phaZ* flanked by two PHA synthase  
253 encoding genes, *phaC1* and *phaC2*. Nine clones carried Class II *phaC* genes (Table 3). The *pha* gene  
254 locus (*phaC1<sub>1</sub>-phaZ-phaC2<sub>1</sub>-phaD-phaF-phaI*) in clone 1 was similar to the canonical locus in  
255 *Pseudomonas* including *P. putida* KT2440 (de Eugenio et al., 2010), except the presence of *orf7*  
256 encoding a PHA granule associated protein (Pfam09650) (Fig. 3A). Clone 2 and clone 15 were  
257 identical to the clone 1, except that they contained an insertion of the 17,013-bp transposon Tn4652  
258 at 13,740 nt and 16,362 nt respectively (Supplementary 2). The Tn4652 duplicated target sequences  
259 were AACTC in clone 2 and TAGGA in clone 15. The transposon insertions in these clones are in  
260 opposite orientation. The same Tn4652 is present in *P. putida* KT2440 genome (3,366,550 -  
261 3,383,562 nt, GenBank: AE015451), located distant from the *pha* gene operon. These insertions  
262 likely occurred following introduction of the cosmid clones into *P. putida*.

263 Class II clones 5, 16, 20 and 50 had no genes encoding *phaD* or *phaFI* homologs. A *phaJ*  
264 gene encoding R-specific enoyl-CoA hydratase was identified in those clones (Fig. 3A;  
265 Supplementary 1). The *phaJ* gene was located immediately upstream of the *phaC* genes in clones 16,  
266 20 and 50, but downstream of *phaC* in clone 5. In addition, a gene encoding PHA depolymerase  
267 (PhaZ) was located downstream of the *phaC* genes in clones 16, 20 and 50. ORFs downstream of the  
268 *phaZ* genes in clones 16 and 50 encoded proteins (PhaC2<sub>16</sub> and PhaC2<sub>50</sub>) homologous to unclassified

269 PHA synthases (Fig. 2; Supplementary 1). The proteins shared conserved regions in PhaC enzymes,  
270 but were ~30% shorter in N-terminal regions than in those of Class I/II PhaC (Supplementary 2).

271 Two ORFs encoding putative PhaC and PhaE proteins were identified in partially assembled  
272 clone P2N10 (Table 3; Supplementary 1). BLASTP showed the P2N10 PhaC protein best matched  
273 to the Class III PhaC [GenBank: WP\_002708071] (43% identity) from *γ-Proteobacteria Thiothrix*  
274 *nivea* (Table 3). The available C-terminal sequence of P2N10 PhaE (234 amino acids) only exhibited  
275 26% identity to the Class III PhaE [GenBank: WP\_002708072] of *T. nivea*. In addition, the P2N10  
276 PhaC protein was only 29% identical to the Class IV PhaC [GenBank: AAD05620] of *Bacillus*  
277 *megaterium*. Phylogenetic analysis suggested that P2N10 PHA synthase was distant from Class  
278 III/IV PhaC and might represent a new subclass of PHA synthases (Fig. 2).

279 Multiple alignment of amino acid sequences of each of the identified 11AW PhaC proteins  
280 showed the conserved catalytic triad (C287, D445 and H473 in PhaC<sub>116</sub>), a tryptophan essential for  
281 dimerization (W391 in PhaC<sub>116</sub>), and the lipase box GXCXGG (Jia et al., 2000) except that Ala  
282 replaced the first Gly residue in PhaC<sub>20</sub> and second Gly in clone P8N7 (Fig. 3B; Supplementary 3).  
283 The serine residue (S229 in PhaC<sub>116</sub>) required for PhaC activity (Hoppensack et al., 1999) was also  
284 conserved in all 11AW PhaC proteins. We chose the PhaC proteins in the Class I clones 14, 18 and  
285 25, and the Class II clones 1, 16 and 20, for further study. We examined the nature of PHA produced  
286 using different carbon sources that result in substrate production either through fatty acid synthesis  
287 or  $\beta$ -oxidation.

288

### 289 **3.3. Class II clone 1 synthesizes MCL PHA**

290 The cloned metagenomic DNA in clone 1 contained 42,747 bp (Table 3) [GenBank:  
291 KT944254] and most likely originated from *γ-Proteobacteria Pseudomonas*. The PhaC<sub>11</sub>, PhaZ,

292 PhaC<sub>2</sub><sub>1</sub> and PhaD proteins [GenBank: ALV86243, ALV86281, ALV86274 and ALV86275] were  
293 82%, 92%, 73% and 78% identical to the corresponding orthologs (PhaC1, PhaZ, PhaC2 and PhaD)  
294 of *P. putida* KT2440. Clone 1 PhaC<sub>2</sub><sub>1</sub> was phylogenetically related to the PHA synthase 2  
295 [GenBank: BAA36202] of *Pseudomonas* sp. 61-3 (Fig. 2). In contrast to other Class II PhaC, the  
296 conserved amino acid at position 129 of PhaC<sub>2</sub><sub>1</sub> was Asp rather than Glu (Fig. 3B). It has been  
297 previously demonstrated that substitution of the conserved Glu with Asp in Class II PhaC improves  
298 PHA yield with an increase of 3-hydroxybutyrate monomer (Matsumoto et al., 2005).

299 PHA synthesis in clone 1 was likely contributed solely by PhaC<sub>2</sub><sub>1</sub> because the 5'-region of  
300 *phaC1<sub>1</sub> was absent in the cloned DNA. Expression of the functional *phaZ* and *phaC2<sub>1</sub> might be  
301 driven by the promoters upstream of the individual genes, as occurs in *P. putida* KT2440 (de  
302 Eugenio et al., 2010). *P. putida* PpUW2 (PHA<sup>-</sup>) carrying clone 1 synthesized 3-hydroxyhexanoate  
303 (3HHx, C6) and 3-hydroxyoctanoate (3HO, C8) copolymer of ~95% C8 monomer when grown with  
304 octanoate, similar to the PHA produced by wild-type *P. putida* PpUW1 (Table 4). When PpUW2  
305 (clone 1) was grown with nonanoic acid, 3-hydroxynonanoate (3HN, C9) and 3-hydroxyheptanoate  
306 (3HP, C7) were incorporated into the PHA with greater 3HP than that synthesized by wild type  
307 PpUW1 (Table 4). These data suggest that those monomers were derived from  $\beta$ -oxidation of  
308 octanoate and nonanoic acid.**

309 When gluconic acid was used as the sole carbon source, 3HO and 3-hydroxydecanoate  
310 (3HD, C10) copolymer was produced in PpUW2 (PHA<sup>-</sup>) carrying clone 1, very similar to the  
311 production of the parental strain PpUW1 (PHA<sup>+</sup>) (Table 4). The monomer composition of PHA was  
312 similar in both strains, but total PHA accumulation was ~4 fold higher in gluconic acid-grown  
313 PpUW2 with clone 1 (Table 4). These results suggest that Class II PhaC<sub>2</sub><sub>1</sub> was able to synthesize  
314 MCL (C6-C10) PHA.

315  
316 **3.4. Class II clone 16 synthesizes SCL-MCL copolymer**  
317 Clone 16 contains 33,900-bp metagenomic DNA [GenBank: KT944263] probably originated  
318 from *β-Proteobacteria Methylibium* (Table 3). A *phaJ* gene (*phaJ<sub>16</sub>*) is predicted to encode a R-  
319 specific enoyl-CoA hydratase [GenBank: ALV86416] (Fig. 3A), which converts the  $\beta$ -oxidation  
320 intermediate 2-enoyl-CoA to (R)-3-hydroxyacyl-CoA used as PhaC substrate (Fukui et al., 1998).  
321 The PhaJ<sub>16</sub> was phylogenetically related to the PhaJ4a<sub>Re</sub> and PhaJ4b<sub>Re</sub> of *Ralstonia eutropha*  
322 (Kawashima et al., 2012), and PhaJ4<sub>Pp</sub> of *P. putida* (Sato et al., 2011) (Supplementary 4A). The  
323 amino acid residues Asp39 and His44 conserved at the active site of the dehydratases were identified  
324 in PhaJ<sub>16</sub> (Supplementary 3B), except that the Ser residue was replaced by Pro71 in PhaJ<sub>16</sub>, same as  
325 in the PhaJ orthologs of *R. eutropha* and *P. putida* PhaJ4.

326 The three ORFs downstream of the *phaJ<sub>16</sub>* gene encoded PhaC<sub>16</sub>, PhaZ and PhaC<sub>216</sub> (Fig.  
327 3A). PhaC<sub>16</sub> of Class II PHA synthase most closely matched the *Pseudomonas* sp. F15 PhaC1  
328 [GenBank: WP\_021487788], exhibiting 48% amino acid identity. PhaC<sub>16</sub> was also 42.5% and  
329 43.4% identical to the PhaC1 and PhaC2 proteins of *P. putida* KT2440. Thr318 and Val478 in the  
330 PhaC<sub>16</sub> might favour the 3HB incorporation into PHA as occurred in the engineered PhaC proteins  
331 (Chen et al., 2014; Takase et al., 2003). Another putative PHA synthase encoded by the *phaC<sub>216</sub>*  
332 gene downstream of the *phaC<sub>16</sub>phaZ* genes was homologous to unclassified PHA synthases (Fig.  
333 2).

334 The quantity of PHA accumulated in *P. putida* UW2 carrying clone 16 was comparable to that  
335 of parental PpUW1 when grown with octanoate, nonanoic acid or gluconic acid (Table 4). In  
336 contrast to the MCL PHA (C6-C8) present in octanoate-grown PpUW2 (clone 1) or wild-type  
337 PpUW1, about 20% 3HB was detected in the PHA (C4-C6-C8) accumulated in PpUW2 carrying



338 clone 16 under the same conditions (Table 4). When PpUW2 (clone 16) was grown with nonanoic  
339 acid (C9), 3-hydroxyheptanoate (3HP, C7), 3-hydroxyvalerate (3HV, C5) and 3HB (C4) were  
340 polymerized, which was in contrast to the 3HP-3HN PHA in nonanoic acid-grown PpUW with  
341 PhaC1 or wild type PpUW1. Additionally, equal amounts of C6 and C8 monomers were detected in  
342 the PHA from gluconic acid-grown PpUW2 with clone 16. However, PHA with C8 and C10  
343 monomers was accumulated in PpUW2 (clone 1) and PpUW1 under the same growth conditions.  
344 These data implied that the PhaC<sub>16</sub> and/or PhaC<sub>216</sub> prefer substrates with shorter carbon chains than  
345 the PhaC<sub>21</sub> in clone 1 and both PhaC proteins of *P. putida* KT2440.

346 To further elucidate the activity of PhaC<sub>16</sub> and PhaC<sub>216</sub>, the genes were cloned  
347 downstream of the constitutively active *Plac* promoter. When *P. putida* PpUW2 carrying pJC123  
348 (*Plac::phaC1<sub>16</sub>*) was grown with octanoate, SCL-MCL copolymer was of similar composition of C4-  
349 C6-C8 monomers to that synthesized by clone 16 (Table 4). However, PHA was not detected in  
350 strain PpUW2 carrying pJC159 (*Plac::phaC2<sub>16</sub>*) under the same growth conditions. Coexpression of  
351 *phaC1<sub>16</sub>* and *phaC2<sub>16</sub>* in pJC157 (*Plac::phaC1<sub>16</sub>-phaC2<sub>16</sub>*) in octanoate-grown PpUW2 resulted in  
352 synthesis of PHA with the similar monomer composition as those in the polymers produced in  
353 PpUW2 carrying clone 16 or pJC123 (*Plac::phaC1<sub>16</sub>*) (Table 4). These data indicated that only the  
354 PhaC<sub>16</sub> was involved in SCL-MCL PHA biosynthesis in clone 16.

355 The *pha* gene locus of clone 16 was very similar to that of clone 50 (Supplementary 1), but  
356 the DNA in clone 50 probably originated from *γ-Proteobacteria Hydrocarboniphata* (Table 3). Both  
357 the Class II PhaC1 and unclassified PhaC2 in clones 16 and 50 shared 84% identity respectively.  
358 Expression of the *pha* genes was probably driven by a promoter upstream of *phaJ* genes.

359

360 **3.5. Class II clone 20 synthesizes MCL or SCL-MCL PHA**



361 PHA<sup>+</sup> clone 20 contained 30,964-bp metagenomic DNA [GenBank: KT944266], which  
362 probably originated from *Salinibacter* within the *Bacteroidetes* (Table 3). The cloned DNA  
363 contained only a single *phaC*<sub>20</sub> gene (Fig. 3A). A putative fatty acid CoA ligase/ synthetase  
364 [GenBank: ALV86493] (ORF9; Supplementary 1) might be involved in degradation of fatty acids to  
365 acyl-CoA (the first step of  $\beta$ -oxidation cycle). The acyl dehydratase PhaJ<sub>20</sub> [GenBank: ALV86492]  
366 was 56% identical to the PhaJ<sub>16</sub>. Conserved amino acid residues Asp41 and His46 at the active sites  
367 of the acyl dehydratases were present (Supplementary 4B) except that the Ser residue was replaced  
368 by Pro73 in the PhaJ<sub>20</sub> protein. The *phaJ*<sub>20</sub>, *phaC*<sub>20</sub> and *phaZ* genes in clone 20 were similar to those  
369 of the corresponding genes in clones 16 and 50 (Fig. 3A; Supplementary 1). In addition, the *pha*  
370 gene cluster of clone 20 was similar to that in *Burkholderia* sp. 383 (1,576,365 -1,581,635 nt)  
371 [GenBank: NC\_007511], but a gene encoding a phasin protein is located between the *phaC* and  
372 *phaZ* genes in the *Burkholderia* genome.

373 The single PhaC<sub>20</sub> [GenBank: ALV86493] best matched to its ortholog from *Burkholderia lata*  
374 at 59% amino acid sequence identity [GenBank: WP\_011354994]. PhaC<sub>20</sub> was 46-53% identical to  
375 the PhaC<sub>16</sub>, PhaC<sub>2</sub> and PhaC<sub>5</sub> as well as PhaC<sub>1</sub> and PhaC<sub>2</sub> of *P. putida* KT2440. Presence of amino  
376 acid residues Thr353 and Val516 in PhaC<sub>20</sub> (Fig. 3B) might favour substrates with fewer carbons  
377 than those preferred by clone 1 and *P. putida* PhaC proteins, as previously demonstrated with  
378 engineered Class II PHA synthases (Chen et al., 2014; Takase et al., 2003).

379 Clone 20 was able to synthesize 3HHx-3HO copolymer (C6-C8) with octanoate (Table 4), as  
380 occurred in PpUW2 (clone 1) and *P. putida* wild type. However, the proportion of C6 monomer  
381 increased 4-35 fold in the PHA isolated from PpUW2 (clone 20), compared to that in PpUW2 (clone  
382 1) and wild-type PpUW1 (Table 4). When nonanoic acid was supplied, PpUW2 (clone 20) produced  
383 PHA with 8% 3-hydroxyvalerate (3HV), which was absent in the PHA synthesized by clone 1 and

384 PpUW1 (Table 4). In contrast to the SCL-MCL PHA produced by clone 16, 3HB was not detected in  
385 the nonanoic acid or octanoate-grown PpUW2 with clone 20.

386 In contrast to the absence of detectable C6 monomer in the PHA produced in PpUW2 with  
387 clone 1 or *P. putida* wild type, 3HHx (~10%) was incorporated into the MCL PHA (C6-C8-C10) in  
388 PpUW2 (clone 20) (Table 4) when gluconic acid was used as the sole carbon source. About half the  
389 quantity of monomers was C10 in the PHA accumulated in PpUW2 (clone 20) grown with gluconic  
390 acid. These results suggested that the carbon chain lengths of favourite monomers of PhaC<sub>20</sub> were  
391 between those of PhaC<sub>16</sub> and PhaC<sub>21</sub>.

392

### 393 **3.6. Class I clone 14 synthesizes SCL-MCL PHA**

394 The DNA in clone 14 probably originated from *β-Proteobacteria Methylibium* (Table 3). The  
395 PhaC<sub>14</sub>, PhaA and PhaB [GenBank: ALV86397, ALV86398 and ALV86399] were 65%, 76% and  
396 74% identical to the PhbC1 (A16\_1437), PhbA (A16\_1438) and PhbB1 (A16\_1439) of *C. necator*  
397 H16, respectively. In addition, PhaC<sub>14</sub> was 48% identical to the PhbC protein (Smc002960) of *S.*  
398 *meliloti* Rm1021. The best match of PhaC<sub>14</sub> was the PhaC protein of *Burkholderia* JOSHI\_001 at  
399 74% (Table 3). The *phaC<sub>14</sub>AB* locus of clone 14 is similar to that of clones 8, 21 and 23  
400 (Supplementary 1). Expression of the *phaC<sub>14</sub>*, *phaA* and *phaB* genes in clone 14 was most likely  
401 driven by a promoter upstream of the *orf9* encoding a hypothetical protein.

402 When PpUW2 (clone 14) was grown with nonanoic acid, 7% 3HB was incorporated into  
403 3HB-3HV copolymer (Table 4). 3HB was the primary monomer of PHA in octanoate- or gluconic  
404 acid-grown PpUW2. Both C6 and C8 monomer were present in the PHA with gluconic acid as  
405 carbon source. However, C8 monomer was absent in the PHA when octanoate was supplied (Table  
406 4). *P. putida* PpUW2 carrying clone 14 produced the highest quantity of PHA among all the PHA<sup>+</sup>

407 clones (Table 4). These results indicated that PhaC<sub>14</sub> could synthesize SCL-MCL copolymer though  
408 3HB was the dominant monomer.

409

### 410 **3.7. Class I clone 18 synthesizes SCL and SCL-MCL PHA**

411 Clone 18 contained 37,818-bp metagenomic DNA [GenBank: KT944264], which probably  
412 originated from *β-Proteobacteria Rubrivirax* (Table 3). The annotated *phaC<sub>18</sub>*, *phaA* and *phaB* were  
413 organized in one operon (Fig. 3A), as also occurred in clones 27 and 51 (Supplementary 1). PhaC<sub>18</sub>  
414 [GenBank: ALV86462] shared 100% and 99% identity to PhaC<sub>27</sub> [GenBank: ALV86602] and  
415 PhaC<sub>51</sub> [GenBank: ALV86651] respectively. The PhaC<sub>18</sub> protein best matched to its homolog in  
416 *Azohydromonas australica* (Table 3), and was 71%, 49% and 61% identical to the PhaC<sub>14</sub>, PhbC<sub>Sm</sub>  
417 and PhbC<sub>1Re</sub> respectively.

418 SCL-MCL PHA (C4-C6-C8) was produced when PpUW2 (clone 18) was grown with  
419 octanoate (Table 4), as occurred in PpUW2 with clone 16. However, the fraction of C6-C8  
420 monomers was only 3% in the PHA from clone 18, in contrast to the ~83% in the copolymer from  
421 clone 16. The yield of PHA was ~7 fold less than that produced by clone 14, but C8 monomer was  
422 absent (Table 4). PHA of 3HB-3HV monomers was accumulated in nonanoic acid-grown PpUW2  
423 (clone 18). The ratio of 3HB to 3HV increased 5 fold compared to that in PpUW2 (clone 14) under  
424 the same growth conditions (Table 4). When PpUW2 carrying clone 18 was grown on gluconic acid,  
425 only PHB was produced. The yield of polymer increased 5 fold compared to that in octanoate-grown  
426 cells, and also the second highest quantity of PHA produced among all strains grown on gluconic  
427 acid. These results implied that PhaC<sub>18</sub> could synthesize SCL- and SCL-MCL PHA dependent of the  
428 available carbon source.

429

### 430 **3.8. Class I clone 19 synthesizes SCL and SCL-MCL PHA**

431 Clone 19 contained 25,085-bp of DNA that might originate from *β-Protoebacteria Leptothrix*  
432 (Table 3) [GenBank: KT944265]. Three ORFs encoded PhaC<sub>19</sub>, PhaA and PhaB for PHA  
433 biosynthesis (Fig. 3A). PhaC<sub>19</sub> shared 99% identity with PhaC<sub>6</sub> and PhaC<sub>3</sub> (Fig. 2). The best match  
434 for PhaC<sub>19</sub> is the ortholog of *A. australica* at 73% (Table 3). The *phaC<sub>19</sub>AB* genes in clone 19  
435 probably consisted of one operon, and the promoter was located upstream of the *phaC<sub>19</sub>*.

436 Clone 19 was able to synthesize SCL-MCL PHA (C4-C6-C8) with octanoate but only PHB  
437 (C4) in gluconic acid-grown PpUW2 (Table 4), as occurred in PpUW2 carrying clone 18. However  
438 ~5 fold more PHA was synthesized by clone 19 than was produced by clone 18 in octanoate medium  
439 (Table 4). In contrast, the quantity of PHA was lower in gluconic acid-grown PpUW2 with clone 19  
440 than it was in the same host carrying clone 18. Moreover, PHA composed of 3HB-3HV monomers  
441 was synthesized in noanoic acid-grown PpUW2 (clone 19), as occurred in PpUW2 (clone 18). These  
442 data suggested that PhaC<sub>19</sub> was able to synthesize both SCL and SCL-MCL PHA.

443

### 444 **3.9. Class I clone 25 synthesizes SCL and SCL-MCL PHA**

445 Clone 25 contained 41,012-bp of DNA [GenBank: KT944269], which was predicted to  
446 originate from *β-Proteobacteria Variovorax* (Table 3). The *phaC<sub>25</sub>* and *phaA* genes were apparently  
447 located in a single operon (Fig. 3A). A *phaB* gene was located 9 open reading frames downstream of  
448 the *phaA*. The *phaC<sub>25A</sub>* and *phaB* loci in clone 25 are similar to those in clone P1N3 (Supplementary  
449 1), though the *phaB* gene in clone P1N3 was four open reading frames away from *phaC<sub>P1N3A</sub>*. PhaC  
450 proteins of clones P1N3 and 25 shared 77% identity. In addition, PhaC<sub>25</sub> was 35% and 61% identical  
451 to PhbC<sub>Sm</sub> and PhbC<sub>1Re</sub>. The conserved amino acid Asp130 affecting PhaC substrate specificity  
452 (Matsumoto et al., 2005) was replaced by Ala152 (Fig. 3B).

453 SCL-MCL PHA (C4-C6-C8) was produced in PpUW2 harbouring clone 25 when grown on  
454 octanoate, and only PHB (C4) was isolated from gluconic acid-grown cells (Table 4). Similar results  
455 were obtained in PpUW2 with clone 18 or clone 19 under the same conditions. However, the  
456 quantity of C6-C8 monomers was greater with clone 25 than those with clone 18 or 19. Nonanoic  
457 acid-grown PpUW2 (clone 25) produced 3HB-3HV copolymer similar to that from PpUW2 with  
458 clone 18 or clone 19 (Table 4). These data suggested that PhaC<sub>25</sub> had similar properties to those of  
459 PhaC<sub>18</sub> and PhaC<sub>29</sub>, but different from that of PhaC<sub>14</sub>.

460

### 461 **3.10. Complementation of *S. meliloti phaC* mutant with 11AW PHA<sup>+</sup> clones**

462 In an earlier study, *S. meliloti* Rm11476 (*exoY::Tn5 phaC::Tn5-233*) had been employed for  
463 functionally harvesting metagenomic library clones pCX92, pCX9M1, pCX9M3 and pCX9M5  
464 expressing Class I PHA synthases (Schallmeyer et al., 2011). The PhaA/PhbB and PhaB/PhbB  
465 proteins encoded by the cloned metagenomic DNA and/or *S. meliloti* genome could supply (R)-3-  
466 hydroxybutyrate for PHB biosynthesis catalyzed by the PhaC/PhbC enzymes. In order to examine  
467 the possibility that the PHA<sup>+</sup> clones of 11AW metagenomic library were able to complement the  
468 PHA<sup>-</sup> phenotype of *S. meliloti* Rm11476, The Class I clones 14, 18, 19 and 25 (Table 3) were  
469 introduced into *S. meliloti* Rm11476. In each case, complementation was observed, indicating PhaC  
470 function in the *S. meliloti* background (Fig. 4), with greatest accumulation of PHA observed with  
471 clone 14. However, when clones pCX92, pCX9M1, pCX9M3 and pCX9M5 were transferred to *P.*  
472 *putida* PpUW2 (PHA<sup>-</sup>), PHA was not detected in the recombinant strains grown with either  
473 octanoate or gluconic acid (data not shown). These results strengthen the argument that multiple  
474 hosts should be employed to screen for novel *phaC* genes.

475 We then asked whether Class II *phaC* could function in the *S. meliloti* background. First, we  
476 observed no detection of PHA when *phaC1<sub>pp</sub>* (*Plac::phaC1<sub>pp</sub>*) was expressed in Rm11476 even  
477 though the *lac* promoter is functional and 3-hydroxybutyrate is supplied by the PhbAB<sub>Sm</sub>. Similarly,  
478 PHA<sup>+</sup> clones 1 and 20 carrying Class II *phaC* genes also failed to complement the PHB<sup>-</sup> phenotype  
479 of *S. meliloti* Rm11476 (Fig. 4), implying that the *phaC2<sub>1</sub>* and *phaC2<sub>0</sub>* genes were not expressed  
480 and/or the substrate (R)-3-hydroxyalkanoic acids were absent in *S. meliloti*. However, when clone 16  
481 was introduced into *S. meliloti* Rm11476, PHA was accumulated to a similar level as with  
482 Rm11476 containing PHB<sup>+</sup> clones pCX92, pCX9M1, pCX9M3 or pCX9M5 (Fig. 4). These data  
483 indicated that the *phaC1<sub>16</sub>* gene was expressed and its product was functional. These results suggest  
484 that *P. putida* is a more permissive surrogate host than *S. meliloti* for screening of novel PHA  
485 synthases.

486

#### 487 **4. Discussion**

488 Biosynthesis of SCL-MCL PHA requires PHA synthases having a broad range of substrate  
489 specificity and SCL and MCL precursors (R-3-hydroxyacyl-CoAs) must be available within the cell.  
490 Building on earlier work that has sought to mine metagenomic DNA for modification of bacterial  
491 PHA production, we have successfully isolated cosmid clones that are able to functionally  
492 complement a *P. putida* PHA synthesis mutant. DNA sequence analysis revealed that the isolated  
493 metagenomic DNA originated from a broad diversity of bacteria, and encoded either Class I or Class  
494 II PHA synthases enzymes. Of note is that DNA from most of the isolated clones did not very  
495 closely match known sequences. Also of interest is the influence that the clones had on the quality  
496 and quantity of PHA produced in the *P. putida* surrogate host background.

497 A major appeal of PHA is that, as alternatives to conventional fossil fuel-derived plastics,  
498 they can be produced from renewable resources. The potential to improve the efficiency and cost of  
499 production, and expand the range of polymers and copolymers that are available for production,  
500 should impact on competitiveness and adoption of these materials in the marketplace. In this context,  
501 it is important to understand how the properties of PHA are determined by the PHA synthase  
502 enzyme and the substrate that is available to those enzymes, which is in turn influenced by the  
503 culture conditions and the metabolic pathways leading to substrate formation (Meng et al., 2014).  
504 PHA consisting of both short-chain-length (SCL,  $\leq C5$ ) and medium-chain-length (MCL,  $\geq C6$ )  
505 monomers have great flexibility, decreased breakage and reduced melting point (Noda et al., 2005).  
506 Most naturally occurring PhaC proteins polymerize either SCL- or MCL-monomers, but there are a  
507 few known examples such as the Class I PhaC of *Aeromonas caviae* (Fukui and Doi, 1997) and some  
508 *Pseudomonas* Class II PhaC (Matsusaki et al., 1998) that can synthesize SCL-MCL copolymers.

509 In the present work, heterologous complementation of the *P. putida* PHA<sup>-</sup> strain facilitated  
510 efficient simultaneous screening of millions of 11AW metagenomic clones, resulting in recovery of  
511 a greater number of novel Class I, Class II, and unclassified PHA synthases than from previous  
512 reports (Cheema et al., 2012; Schallmeyer et al., 2011). Additionally, the clones carrying Class I *phaC*  
513 isolated in *P. putida* were able to complement the PHA<sup>-</sup> phenotype of *S. meliloti*, but the previously  
514 isolated Class I clones isolated in *S. meliloti* (Schallmeyer et al., 2011) failed to synthesize PHA in *P.*  
515 *putida*. These results support the development of multi-host systems to increase the chances of the  
516 successful expression of *pha* genes of interest.

517 Biosynthesis of SCL-MCL PHA of various forms by Class I clones 14, 18, 19 and 25 and  
518 Class II clones 16 and 20 suggested availability of a full range of R-3-hydroxyacyl-CoAs derived  
519 from  $\beta$ -oxidation of fatty acids such as nonanoic acid and octanoate. The differential monomer



520 compositions in PHA synthesized by the Class II enzymes PhaC<sub>16</sub> and PhaC<sub>20</sub> are of particular  
521 interest, especially since most Class II PHA synthases are unable to incorporate SCL monomers such  
522 as 3HB and 3HV. Changes of conserved amino acid residues Ser325Thr, Leu484Val, and  
523 Glu508Leu (conserved positions in *P. putida* PhaC1) have been identified to be involved in PhaC  
524 substrate specificity and PHA yield (Chen et al., 2014; Shozui et al., 2010; Takase et al., 2003).  
525 Presence of the amino acids Thr353 (corresponding to *P. putida* PhaC1 position 325), Val516  
526 (corresponding to *P. putida* PhaC1 position 484) and Ala540 (corresponding to *P. putida* PhaC1  
527 position 508) PhaC<sub>20</sub> might contribute to the enzyme's ability to incorporate SCL monomers  
528 compared to those of 11AW PhaC<sub>21</sub> and PHA synthases of *P. putida* KT2440. Similarly, the  
529 presence of three residues (Thr317, Val478 and Leu502) at these positions in PhaC<sub>16</sub>, most likely  
530 resulted in increased 3HB content as demonstrated previously with engineered Class II PHA  
531 synthases (Chen et al., 2014; Shozui et al., 2010; Takase et al., 2003).

532

## 533 **5. Conclusions**

534 We obtained 27 clones encoding Class I, II and unclassified PHA synthases by functional  
535 screening of soil metagenomic cosmid clones in a *P. putida* PHA<sup>-</sup> strain. Seven clones that were  
536 characterized in more detail were able to produce a broad range of polymers and copolymers,  
537 including SCL-MCL mixtures, depending on carbon source. Through this work we have  
538 demonstrated the potential for using metagenome-derived clones for production of a variety of PHAs  
539 of possible industrial utility. The collection of PHA metabolism genes from uncultivated organisms  
540 provides not only a resource for production strain development, but also a series of sequence  
541 templates that could prove useful in enzyme engineering efforts directed towards generation of PHA  
542 products with desired properties.



543

544 **Nucleotide sequence accession numbers**

545 Complete sequences of 11AW metagenomic PHA<sup>+</sup> DNA have been deposited in GenBank  
546 nucleotide sequence database [GenBank: KT944254-KT944278, KU728995 and KU728996].

547

548 **Abbreviations**

549 *P. putida*, *Pseudomonas putida*; PHA, polyhydroxyalkanoate; PhaA/PhbA,  $\beta$ -ketothiolase;  
550 PhaB/PhbB, acetoacetyl-CoA reductase; PhaC/PhbC, PHA synthase; PhaZ, PHA depolymerase;  
551 PhaJ, R-specific enoyl-CoA hydratase; 3HA, 3-hydroxyalkanoate; 3HB, 3-hydroxybutyrate; 3HV,  
552 3-hydroxyvalerate; 3HHx, 3-hydroxyhexanoate; 3HP, 3-hydroxyheptanoate; 3HO, 3-  
553 hydroxyoctanoate; 3HN, 3-hydroxynonanoate; 3HD, 3-hydroxydecanoate; SCL, short chain length;  
554 MCL, medium chain length; *S. meliloti*, *Sinorhizobium meliloti*; GC-MS, gas chromatography-mass  
555 spectrometry; CDW, cell dry weight.

556

557 **Competing interests**

558 The authors declare that they do not have competing interests.

559

560 **Authors' contributions**

561 JC and TCC conceived and designed this study, carried out all the experiments, and prepared  
562 the manuscript. Both authors read and approved the final manuscript.

563

564

565

## 566 **Acknowledgements**

567 This work was financially supported by a New Directions grant from Ontario Ministry of  
568 Agriculture, Food, and Rural Affairs (OMAFRA), and partially by a Strategic Projects grant from  
569 the Natural Sciences and Engineering Research Council of Canada (NSERC) and by Genome  
570 Canada for the project “Microbial Genomics for Biofuels and Co-Products from Biorefining  
571 Processes”. We are very grateful to Ricardo Nordeste for assisting with GC-MS analysis of PHA. We  
572 wish to thank Dr. Bruce Ramsay (Polyferm Canada) for providing PHA standards, and Dr. Josh  
573 Neufeld for use of the FilterMax F5 Multi-mode microplate reader.

## 574 **Supplementary**

575 Supplementary 1: *pha* gene locus in 11AW PHA<sup>+</sup> metagenomic clones

576 Supplementary 2. Transposon Tn4652 in 11AW Clones 2 and 15

577 Supplementary 3: Multiple sequence alignment of polyhydroxyalkanoate synthases of 11AW PHA<sup>+</sup>  
578 metagenomic clones

579 Supplementary 4: Phylogenetic analysis and sequence alignment of R-specific enoyl-CoA hydratase

580 PhaJ

581

## 582 **References**

- 583
- 584 Cheema, S., Bassas-Galia, M., Sarma, P.M., Lal, B., Arias, S., 2012. Exploiting metagenomic  
585 diversity for novel polyhydroxyalkanoate synthases: Production of a terpolymer poly(3-  
586 hydroxybutyrate-co-3-hydroxyhexanoate-co-3-hydroxyoctanoate) with a recombinant  
587 *Pseudomonas putida* strain. Bioresource Technology 103, 322–328.  
588 doi:10.1016/j.biortech.2011.09.098
- 589 Chen, Y.-J., Tsai, P.-C., Hsu, C.-H., Lee, C.-Y., 2014. Critical residues of class II PHA synthase for  
590 expanding the substrate specificity and enhancing the biosynthesis of polyhydroxyalkanoate.  
591 Enzyme and Microbial Technology 56, 60–66. doi:10.1016/j.enzmictec.2014.01.005
- 592 Cheng, J., Pinnell, L., Engel, K., Neufeld, J.D., Charles, T.C., 2014. Versatile broad-host-range  
593 cosmids for construction of high quality metagenomic libraries. Journal of Microbiological  
594 Methods 99, 27–34. doi:10.1016/j.mimet.2014.01.015
- 595 de Eugenio, L.I., Escapa, I.F., Morales, V., Dinjaski, N., Galàn, B., García, J.L., Prieto, M.A., 2010.  
596 The turnover of medium-chain-length polyhydroxyalkanoates in *Pseudomonas putida* KT2442

- 597 and the fundamental role of PhaZ depolymerase for the metabolic balance. *Environ. Microbiol.*  
598 12, 207–221. doi:10.1111/j.1462-2920.2009.02061.x
- 599 Edgar, R.C., 2004. MUSCLE: a multiple sequence alignment method with reduced time and space  
600 complexity. *BMC Bioinformatics* 5, 113–19. doi:10.1186/1471-2105-5-113
- 601 Escapa, I.F., Morales, V., Martino, V.P., Pollet, E., Avérous, L., García, J.L., Prieto, M.A., 2011.  
602 Disruption of  $\beta$ -oxidation pathway in *Pseudomonas putida* KT2442 to produce new  
603 functionalized PHAs with thioester groups. *Appl. Microbiol. Biotechnol.* 89, 1583–1598.  
604 doi:10.1007/s00253-011-3099-4
- 605 Fellay, R., Frey, J., Krisch, H., 1987. Interposon mutagenesis of soil and water bacteria: a family of  
606 DNA fragments designed for in vitro insertional mutagenesis of gram-negative bacteria. *Gene*  
607 52, 147–154.
- 608 Foong, C.P., Lau, N.-S., Deguchi, S., Toyofuku, T., Taylor, T.D., Sudesh, K., Matsui, M., 2014.  
609 Whole genome amplification approach reveals novel polyhydroxyalkanoate synthases (PhaCs)  
610 from Japan trench and nankai trough seawater. *BMC Microbiol.* 14, e11836.  
611 doi:10.1186/s12866-014-0318-z
- 612 Fukui, T., Doi, Y., 1997. Cloning and analysis of the poly(3-hydroxybutyrate-co-3-  
613 hydroxyhexanoate) biosynthesis genes of *Aeromonas caviae*. *J. Bacteriol.* 179, 4821–4830.  
614 doi:10.1186/s12866-014-0318-z
- 615 Fukui, T., Shiomi, N., Doi, Y., 1998. Expression and characterization of (R)-specific enoyl  
616 coenzyme A hydratase involved in polyhydroxyalkanoate biosynthesis by *Aeromonas caviae*. *J.*  
617 *Bacteriol.* 180, 667–673.
- 618 Hoppensack, A., Rehm, B.H., Steinbüchel, A., 1999. Analysis of 4-phosphopantetheinylation of  
619 polyhydroxybutyrate synthase from *Ralstonia eutropha*: generation of beta-alanine auxotrophic  
620 Tn5 mutants and cloning of the panD gene region. *J. Bacteriol.* 181, 1429–1435.
- 621 Jia, Y., Kappock, T.J., Frick, T., Sinskey, A.J., Stubbe, J., 2000. Lipases provide a new mechanistic  
622 model for polyhydroxybutyrate (PHB) synthases: characterization of the functional residues in  
623 *Chromatium vinosum* PHB synthase. *Biochemistry* 39, 3927–3936. doi:10.1021/bi9928086
- 624 Kawashima, Y., Cheng, W., Mifune, J., Orita, I., Nakamura, S., Fukui, T., 2012. Characterization  
625 and functional analyses of R-specific enoyl coenzyme A hydratases in polyhydroxyalkanoate-  
626 producing *Ralstonia eutropha*. *Appl. Environ. Microbiol.* 78, 493–502.  
627 doi:10.1128/AEM.06937-11
- 628 Keshavarz, T., Roy, I., 2010. Polyhydroxyalkanoates: bioplastics with a green agenda. *Current*  
629 *Opinion in Microbiology* 13, 321–326. doi:10.1016/j.mib.2010.02.006
- 630 Matsumoto, K., Takase, K., Aoki, E., Doi, Y., Taguchi, S., 2005. Synergistic effects of Glu130Asp  
631 substitution in the type II polyhydroxyalkanoate (PHA) synthase: enhancement of PHA  
632 production and alteration of polymer molecular weight. *Biomacromolecules* 6, 99–104.  
633 doi:10.1021/bm049650b
- 634 Matsusaki, H., Manji, S., Taguchi, K., Kato, M., Fukui, T., Doi, Y., 1998. Cloning and molecular  
635 analysis of the Poly(3-hydroxybutyrate) and Poly(3-hydroxybutyrate-co-3-hydroxyalkanoate)  
636 biosynthesis genes in *Pseudomonas* sp. strain 61-3. *J. Bacteriol.* 180, 6459–6467.
- 637 Meng, D.-C., Shen, R., Yao, H., Chen, J.-C., Wu, Q., Chen, G.-Q., 2014. Engineering the diversity  
638 of polyesters. *Curr. Opin. Biotechnol.* 29, 24–33. doi:10.1016/j.copbio.2014.02.013
- 639 Noda, I., Green, P.R., Satkowski, M.M., Schechtman, L.A., 2005. Preparation and properties of a  
640 novel class of polyhydroxyalkanoate copolymers. *Biomacromolecules* 6, 580–586.  
641 doi:10.1021/bm049472m

- 642 Park, S.J., Kim, T.W., Kim, M.K., Lee, S.Y., Lim, S.-C., 2012. Advanced bacterial  
643 polyhydroxyalkanoates: towards a versatile and sustainable platform for unnatural tailor-made  
644 polyesters. *Biotechnology Advances* 30, 1196–1206. doi:10.1016/j.biotechadv.2011.11.007
- 645 Patil, K.R., Roune, L., McHardy, A.C., 2012. The PhyloPythiaS web server for taxonomic  
646 assignment of metagenome sequences. *PLoS ONE* 7, e38581. doi:10.1371/journal.pone.0038581
- 647 Pärnänen, K., Karkman, A., Virta, M., Eronen-Rasimus, E., Kaartokallio, H., 2015. Discovery of  
648 bacterial polyhydroxyalkanoate synthase (PhaC)-encoding genes from seasonal Baltic Sea ice  
649 and cold estuarine waters. *Extremophiles* 19, 197–206. doi:10.1007/s00792-014-0699-9
- 650 Quandt, J., Hynes, M.F., 1993. Versatile suicide vectors which allow direct selection for gene  
651 replacement in Gram-negative bacteria. *Gene* 127, 15–21. doi:10.1016/0378-1119(93)90611-6
- 652 Rehm, B.H.A., 2003. Polyester synthases: natural catalysts for plastics. *Biochem. J.* 376, 15–33.  
653 doi:10.1042/BJ20031254
- 654 Sato, S., Kanazawa, H., Tsuge, T., 2011. Expression and characterization of (R)-specific enoyl  
655 coenzyme A hydratases making a channeling route to polyhydroxyalkanoate biosynthesis in  
656 *Pseudomonas putida*. *Appl. Microbiol. Biotechnol.* 90, 951–959. doi:10.1007/s00253-011-3150-  
657 5
- 658 Schallmeyer, M., Ly, A., Wang, C., Meglei, G., Voget, S., Streit, W.R., Driscoll, B.T., Charles, T.C.,  
659 2011. Harvesting of novel polyhydroxyalkanoate (PHA) synthase encoding genes from a soil  
660 metagenome library using phenotypic screening. *FEMS Microbiol Lett* 321, 150–156.  
661 doi:10.1111/j.1574-6968.2011.02324.x
- 662 Sheu, D.S., Wang, Y.T., Lee, C.Y., 2000. Rapid detection of polyhydroxyalkanoate-accumulating  
663 bacteria isolated from the environment by colony PCR. *Microbiology* 146 ( Pt 8), 2019–2025.  
664 doi:10.1099/00221287-146-8-2019
- 665 Shozui, F., Sun, J., Song, Y., Yamada, M., Sakai, K., Matsumoto, K., Takase, K., Taguchi, S., 2010.  
666 A new beneficial mutation in *Pseudomonas* sp. 61-3 polyhydroxyalkanoate (PHA) synthase for  
667 enhanced cellular content of 3-hydroxybutyrate-based PHA explored using its enzyme homolog  
668 as a mutation template. *Biosci. Biotechnol. Biochem.* 74, 1710–1712. doi:10.1271/bbb.100224
- 669 Simon, C., Daniel, R., 2011. Metagenomic analyses: past and future trends. *Appl. Environ.*  
670 *Microbiol.* 77, 1153–1161. doi:10.1128/AEM.02345-10
- 671 Tai, Y.T., Foong, C.P., Najimudin, N., Sudesh, K., 2015. Discovery of a new polyhydroxyalkanoate  
672 synthase from limestone soil through metagenomic approach. *Journal of Bioscience and*  
673 *Bioengineering.* doi:10.1016/j.jbiosc.2015.08.008
- 674 Takase, K., Taguchi, S., Doi, Y., 2003. Enhanced synthesis of poly(3-hydroxybutyrate) in  
675 recombinant *Escherichia coli* by means of error-prone PCR mutagenesis, saturation mutagenesis,  
676 and in vitro recombination of the type II polyhydroxyalkanoate synthase gene. *J. Biochem.* 133,  
677 139–145.
- 678 Tamura, K., Stecher, G., Peterson, D., Filipowski, A., Kumar, S., 2013. MEGA6: Molecular  
679 Evolutionary Genetics Analysis version 6.0. *Mol. Biol. Evol.* 30, 2725–2729.  
680 doi:10.1093/molbev/mst197
- 681 Tortajada, M., da Silva, L.F., Prieto, M.A., 2013. Second-generation functionalized medium-chain-  
682 length polyhydroxyalkanoates: the gateway to high-value bioplastic applications. *Int. Microbiol.*  
683 16, 1–15. doi:10.2436/20.1501.01.175
- 684 Tripathi, L., Wu, L.-P., Dechuan, M., Chen, J., Wu, Q., Chen, G.-Q., 2013. *Pseudomonas putida*  
685 KT2442 as a platform for the biosynthesis of polyhydroxyalkanoates with adjustable monomer  
686 contents and compositions. *Bioresource Technology* 142, 225–231.  
687 doi:10.1016/j.biortech.2013.05.027

688 Verlinden, R.A.J., Hill, D.J., Kenward, M.A., Williams, C.D., Radecka, I., 2007. Bacterial synthesis  
689 of biodegradable polyhydroxyalkanoates. *J Appl Microbiol* 102, 1437–1449.  
690 doi:10.1111/j.1365-2672.2007.03335.x  
691 Wu, H.-A., Sheu, D.-S., Lee, C.-Y., 2003. Rapid differentiation between short-chain-length and  
692 medium-chain-length polyhydroxyalkanoate-accumulating bacteria with spectrofluorometry.  
693 *Journal of Microbiological Methods* 53, 131–135. doi:10.1016/S0167-7012(02)00232-4  
694 Zhu, W., Lomsadze, A., Borodovsky, M., 2010. Ab initio gene identification in metagenomic  
695 sequences. *Nucleic Acids Research* 38, e132–e132. doi:10.1093/nar/gkq275  
696  
697  
698

699 **Figure legends**  
700

701 Fig. 1. Activity-based screening of 11AW metagenomic library clones carrying PHA biosynthesis  
702 genes in *P. putida* PpUW2 (PHA<sup>-</sup>). PpUW2 recombinant strains were grown in 0.1N M63 medium  
703 containing 0.5% Na octanoate and Nile red (0.5 µg/ml). Cosmid pJC8 and pJC67 (*Plac::phaC1<sub>Pp</sub>*)  
704 were used as negative and positive controls respectively. 11AW clones 14 and 16 were streaked on  
705 the same selection plate to verify the PHA<sup>+</sup> phenotype initially screened on LB with 0.5% (w/v)  
706 octanoate.  
707

708 Fig. 2. Phylogenetic analysis of the polyhydroalkanoate synthases (PhaC) of 11AW metagenomic  
709 library clones. Protein sequence alignments were performed using MUSCLE (Edgar, 2004).  
710 Neighbour-joining phylogenetic trees were generated with MEGA6 (Tamura et al., 2013). GenBank  
711 accession numbers of 11AW PhaC proteins: PhaC<sub>21</sub> (ALV86274), PhaC<sub>3</sub> (ALV86289), PhaC<sub>4</sub>  
712 (ALV86299), PhaC<sub>5</sub> (ALV86308), PhaC<sub>6</sub> (ALV86351), PhaC<sub>7</sub> (partial, ALV86358), PhaC<sub>8</sub>  
713 (ALV86364), PhaC<sub>10</sub> (partial, ALV86387), PhaC<sub>14</sub> (ALV86397), PhaC<sub>16</sub> (ALV86417), PhaC<sub>216</sub>  
714 (ALV86419), PhaC<sub>18</sub> (ALV86462), PhaC<sub>19</sub> (ALV86476), PhaC<sub>20</sub> (ALV86493), PhaC<sub>21</sub>  
715 (ALV86517), PhaC<sub>23</sub> (ALV86529), PhaC<sub>25</sub> (ALV86574), PhaC<sub>27</sub> (ALV86602), PhaC<sub>150</sub>

716 (ALV86626), PhaC<sub>250</sub> (ALV86626), PhaC<sub>51</sub> (ALV86651), PhaC<sub>P1N3</sub> (ALV86715), PhaC<sub>P2N8</sub>  
717 (ALV86750), PhaC<sub>P2N10</sub> (partial, ALV86755), PhaC<sub>P4N10</sub> (ALV86768), PhaC<sub>P8N7</sub> (ALV86771).

718  
719 Fig. 3. The *pha* genes and PhaC proteins in 11AW metagenomic DNA library clones. (A) The PHA<sup>+</sup>  
720 clones are classified into Class I and II based on the PhaC protein sequences. (B) Conserved amino  
721 acids required for the activity of PHA synthases are indicated in closed triangles. Residues affecting  
722 substrate specificity were marked by open triangles. The positions of amino acid residues were  
723 numbered based on the sequence of PhaC<sub>16</sub> [GenBank: ALV86417]. GenBank accession numbers  
724 of PhaC proteins: PhaC<sub>14</sub>, ALV86397; PhaC<sub>18</sub>, ALV86462; PhaC<sub>19</sub>, ALV86476; PhaC<sub>25</sub>,  
725 ALV86574; PhaC<sub>12</sub>, ALV86274; PhaC<sub>20</sub>, ALV86493; PhaC<sub>16</sub>, ALV86417; *C. necator* PhbC1,  
726 AAA21975; *P. putida* PhaC1, Q88D25; and *P. sp.* 61-3 PhaC1, BAA36200.

727  
728 Fig. 4. Complementation of *S. meliloti* Rm11476 (*phbC*) with metagenomic clones. The cosmid  
729 DNA of PHA<sup>+</sup> clones encoding Class I and II PHA synthases was transferred to *S. meliloti* Rm11476  
730 by conjugation. Recombinant strains were grown in YM medium. PHA production was estimated by  
731 measuring the fluorescence of Nile red stained cells. *S. meliloti* wild type Rm1021 and previously  
732 isolated Class I clones (CX92, pCX92M1, pCX92M3, and pCX92M5; (Schallmeyer et al., 2011))  
733 were used as controls.

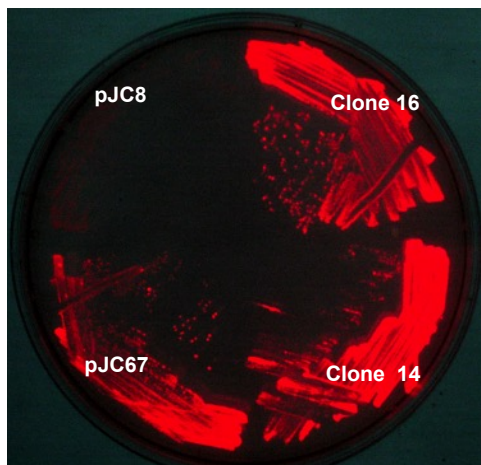

Figure 1.



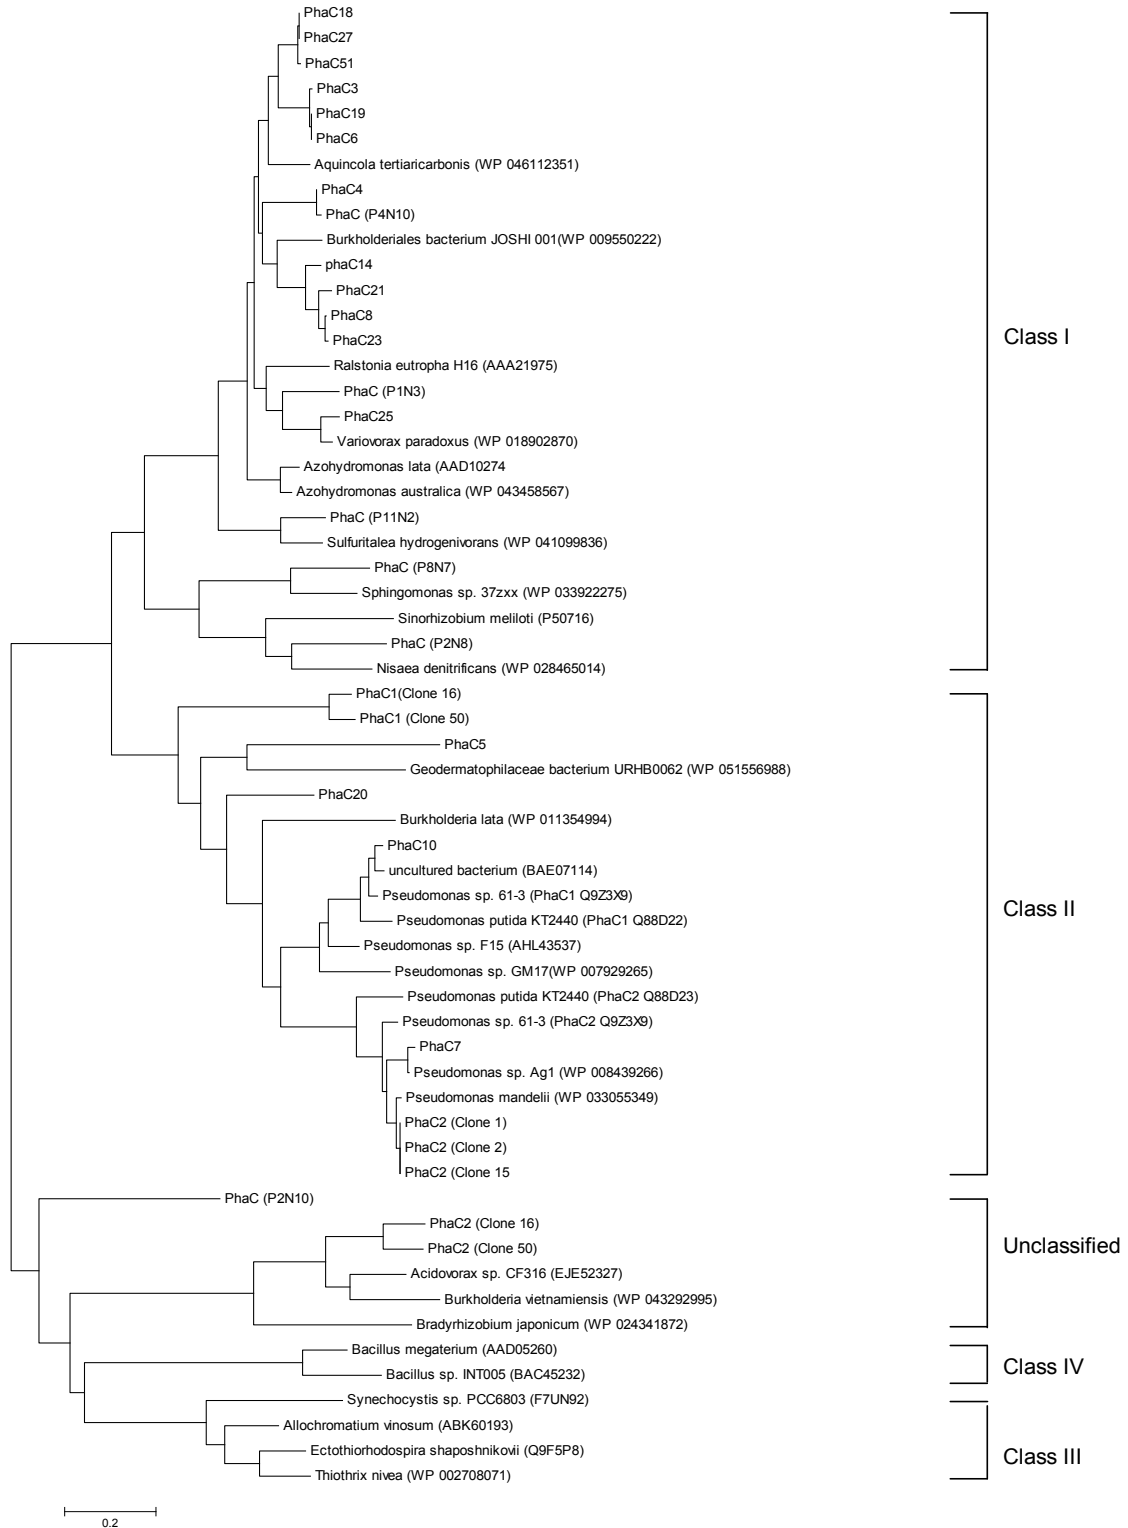

Fig. 2



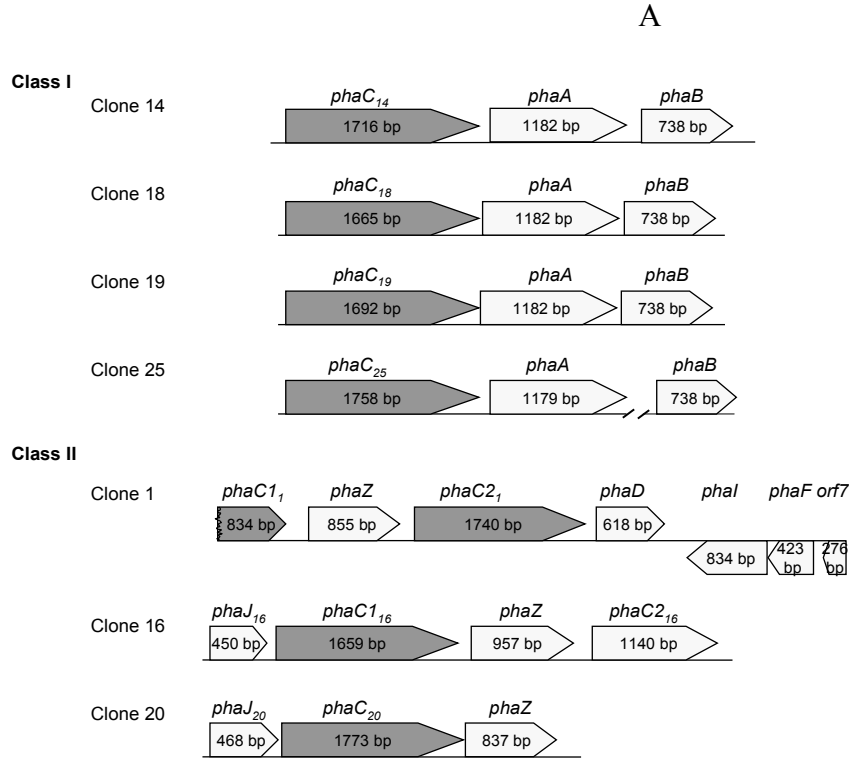

B

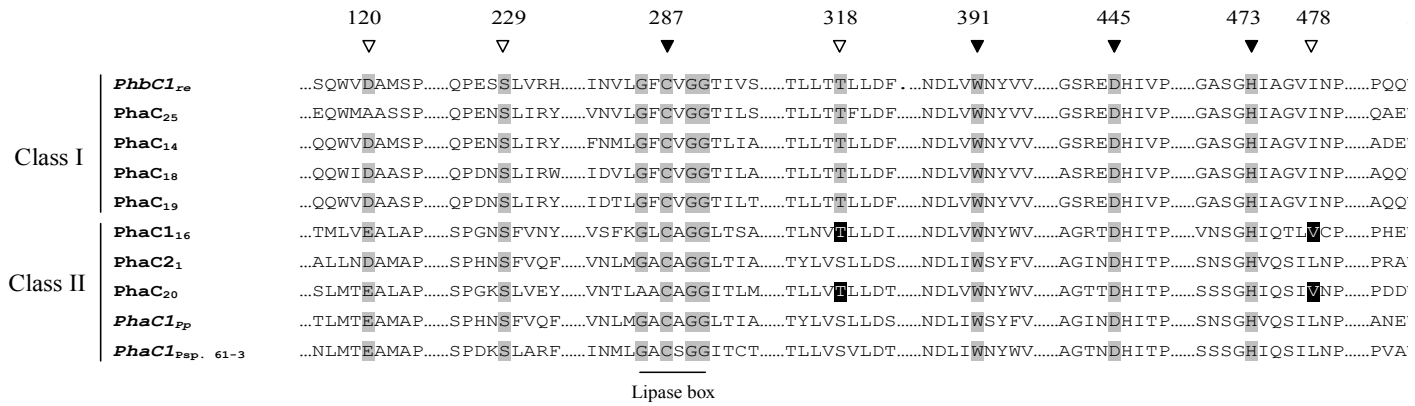

Fig. 3

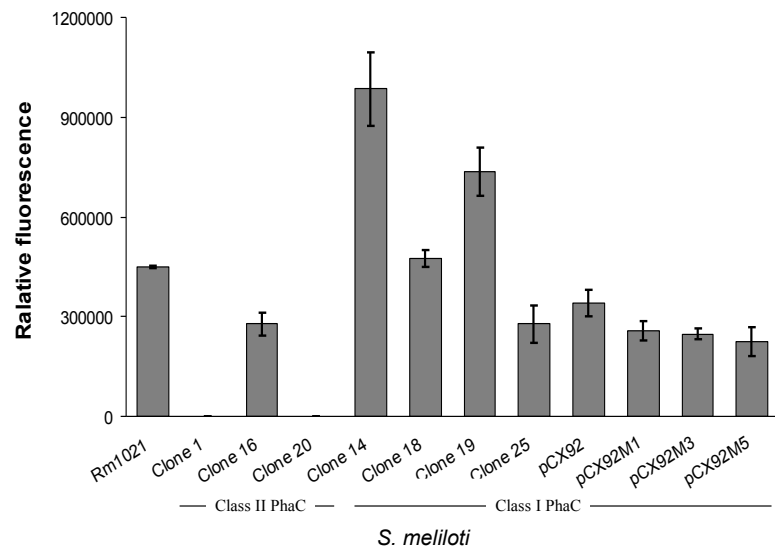

Fig. 4

Table 1. Bacterial strains, plasmids and cosmids

| Strain, plasmids and cosmids | Relevant characteristics*                                                                                               | Reference                  |
|------------------------------|-------------------------------------------------------------------------------------------------------------------------|----------------------------|
| <i>E. coli</i>               |                                                                                                                         |                            |
| DH5α                         | F <sup>-</sup> φ80 <i>lacZΔM15Δ(lacZYA-argF)U169 recA1 endA1 hsdR17 phoA supE44 thi-1 gyrA96 relA1</i>                  | Life Technologies          |
| DH5α (Rif <sup>R</sup> )     | A spontaneous Rif <sup>r</sup> mutant of DH5α                                                                           | (Cheng et al., 2014)       |
| HB101                        | F <sup>-</sup> <i>thi-1 hsdS20 supE44 recA13 ara-14 leuB6 proA2 lacY1 galK2 rpsL20 xyl-5 mtl-1, Sm<sup>R</sup></i>      | Life Technologies          |
| <i>S. meliloti</i>           |                                                                                                                         |                            |
| Rm1021                       | Wild type, Sm <sup>R</sup>                                                                                              | Lab collection             |
| Rm11476                      | Rm1021, <i>exoY::Tn5 phbC::Tn5-233, Sm<sup>R</sup> Nm<sup>R</sup></i>                                                   | (Schallmeyer et al., 2011) |
| <i>P. putida</i>             |                                                                                                                         |                            |
| KT2440                       | Wild type                                                                                                               | Lab collection             |
| PpUW1                        | A spontaneous Rif <sup>R</sup> mutant of KT2440, Rif <sup>R</sup>                                                       | This study                 |
| PpUW2                        | PpUW1 ( <i>phaC1-phaZ-phaC2::ΩKm<sup>R</sup></i> ), Rif <sup>R</sup> Km <sup>R</sup>                                    | This study                 |
| Plasmids/cosmids             |                                                                                                                         |                            |
| pRK600                       | pRK2013 <i>tra Nm<sup>R</sup>::Tn9, Cm<sup>R</sup></i>                                                                  | Lab collection             |
| pRK7813                      | IncP <i>oriT cos lacZα, Tc<sup>R</sup></i>                                                                              | Lab collection             |
| pJC8                         | Broad-host-range Gateway <sup>®</sup> entry cosmid, Tc <sup>R</sup>                                                     | (Cheng et al., 2014)       |
| pJQ200-SK                    | Cloning vector, <i>sacB, Gm<sup>R</sup></i>                                                                             | (Quandt and Hynes, 1993)   |
| pHP45-ΩKm <sup>R</sup>       | Ω-Km <sup>R</sup> cassette, Km <sup>R</sup>                                                                             | (Fellay et al., 1987)      |
| pJC63                        | pJQ200-SK carrying 5'- <i>phaC1</i> of <i>P. putida</i> KT2440, Gm <sup>R</sup>                                         | This study                 |
| pJC69                        | pJC63 carrying 3'- <i>phaC2</i> of <i>P. putida</i> KT2440, Gm <sup>R</sup>                                             | This study                 |
| pJC71                        | pJC69 carrying Ω-Km <sup>R</sup> between the <i>phaC1'</i> and <i>phaC2'</i> fragments, Gm <sup>R</sup> Km <sup>R</sup> | This study                 |
| pJC67                        | pRK7813 carrying <i>Plac::phaC1<sub>pp</sub>, Tc<sup>R</sup></i>                                                        | This study                 |
| pJC123                       | pRK7813 carrying <i>Plac::phaC1<sub>16}, Tc<sup>R</sup></sub></i>                                                       | This study                 |
| pJC157                       | pRK7813 carrying <i>Plac::phaC1<sub>16}:phaC2<sub>16}, Tc<sup>R</sup></sub></sub></i>                                   | This study                 |
| pJC159                       | pRK7813 carrying <i>Plac::phaC2<sub>16}, Tc<sup>R</sup></sub></i>                                                       | This study                 |
| pCX92                        | pRK7813 carrying <i>phaC</i> and <i>phaP</i> , Tc <sup>R</sup>                                                          | (Schallmeyer et al., 2011) |
| pCX9M1                       | pRK7813 carrying <i>phaC, phaA</i> and <i>phaB</i> , Tc <sup>R</sup>                                                    | (Schallmeyer et al., 2011) |
| pCX9M3                       | pRK7813 carrying <i>phaC</i> , Tc <sup>R</sup>                                                                          | (Schallmeyer et al., 2011) |
| pCX9M5                       | pRK7813 carrying <i>phaC</i> and <i>phaB</i> , Tc <sup>R</sup>                                                          | (Schallmeyer et al., 2011) |

\*Antibiotic resistances: Cm<sup>R</sup>, chloramphenicol; Gm<sup>R</sup>, gentamycin; Km<sup>R</sup>, kanamycin; Nm<sup>R</sup>, neomycin; Sm<sup>R</sup>, streptomycin; Tc<sup>R</sup>, tetracycline.

Table 2. DNA oligonucleotides

| Oligo ID     | Sequence                                                                             |
|--------------|--------------------------------------------------------------------------------------|
| JC159        | CGCC <u>AAGCTTGTG</u> <b><u>AGGAG</u></b> CGTCGTAGATGAGTAAC                          |
| JC160        | GCGCGGATCCTCAACGCTCGTGAACGTAGGT                                                      |
| JC161        | GCGCTCTAGACACGAAAGTCGGGTAACCAAT                                                      |
| JC162        | GGTCGGATCCCGCCAGCTGATGATGAAGGTC                                                      |
| JC163        | GCTGGGATCCGTTGTGGCTGGAGTGGATCAC                                                      |
| JC164        | CGCCCTCGAGCACCGGTACCCTGATCTGATA                                                      |
| phaCF1       | ATCAACAARTWCTACRTCYTSGACCT                                                           |
| phaCR2       | GTSTTCRTRSRTSWCTGGCGCAACCC                                                           |
| phaCR4       | AGGTAGTTGTYGACSMRTAGKTCCA                                                            |
| JC202        | CCGGATGCAT <b><u>GATAGGAG</u></b> CGCCGGATGACAGCAGAGAAGGCTGAG                        |
| KC228        | CCCAGATCTGCAGTATTCTAGATTCAGGCGCGCACGCGCACGTA                                         |
| JC204        | CCGGTCTAG <u>AGGA</u> ACGTCCCATGAGCAATCC                                             |
| JC205        | GGGGATGCATGCCTCAGGCGAAGTACTGGCCGCCATTG                                               |
| JC301        | CGCGAAGCTTCT <b><u>G</u></b> <b><u>AGGAG</u></b> GAGAACACATGGCGAAGACCA               |
| JC302        | GGGGAATTCTGAATATCAGCGTCGGAGCATG                                                      |
| JC333        | CGCGAAGCTT <b><u>GTG</u></b> <b><u>AGGAG</u></b> AGATCTATGAGCTCCCTCCCCGTGGCCGAACGTTC |
| JC334        | CGCTGAATTCTCTACGCCGCTGACCCACGAT                                                      |
| JC337        | ACCAGAATTC <b><u>AGGAG</u></b> ATCTATATGAGCTCCCTCCCCGTGGCCGAAC                       |
| pJET forward | CGACTCACTATAGGGAGAGCGGC                                                              |
| pJET reverse | AAGAACATCGATTTCCATGGCAG                                                              |

Restriction sites are underlined. Translation stop codon is in bold, and ribosomal binding site is

double underlined.

Table 3. 11AW metagenomic clones encoding PHA synthases (PhaC).

| PHA <sup>+</sup> Clones  | DNA (bp) | GC content (%) | Possible origin of cloned DNA                        | Best match of PHA synthases                                                                        | Identity (%) | Cosmid Genbank ID |
|--------------------------|----------|----------------|------------------------------------------------------|----------------------------------------------------------------------------------------------------|--------------|-------------------|
| <b>Class I</b>           |          |                |                                                      |                                                                                                    |              |                   |
| 3                        | >16,077  | 67.5           | <i>Leptothrix</i> ( <i>̑</i> -Proteobacteria)        | Hypothetical protein (WP_046112351), <i>Aquicola tertiarycarbonis</i>                              | 74           | KT944255          |
| 4                        | 40,585   | 65.7           | <i>Leptothrix</i> ( <i>̑</i> -Proteobacteria)        | Polyhydroxyalkanoate synthase (AAD10274), <i>Azohydromonas lata</i>                                | 72           | KT944256          |
| 6                        | >11,479  | 67.7           | <i>Leptothrix</i> ( <i>̑</i> -Proteobacteria)        | Polyhydroxyalkanoate synthase (AAD10274), <i>Azohydromonas lata</i>                                | 73           | KT944258          |
| 8                        | 34,220   | 67.8           | <i>Leptothrix</i> ( <i>̑</i> -Proteobacteria)        | Poly-(R)-hydroxyalkanoic acid synthase (WP_009550222), Burkholderiales bacterium JOSHI_001         | 74           | KT944260          |
| 14                       | 29,565   | 69.1           | <i>Methylibium</i> ( <i>̑</i> -Proteobacteria)       | Poly-(R)-hydroxyalkanoic acid synthase (WP_009550222), Burkholderiales bacterium JOSHI_001         | 74           | KT944262          |
| 18                       | 37,718   | 69.4           | <i>Rubrivivax</i> ( <i>̑</i> -Proteobacteria)        | Hypothetical protein (WP_043458567), <i>Azohydromonas australica</i>                               | 73           | KT944264          |
| 19                       | 25,085   | 68.1           | <i>Leptothrix</i> ( <i>̑</i> -Proteobacteria)        | Polyhydroxyalkanoate synthase (AAD10274), <i>Azohydromonas lata</i>                                | 73           | KT944265          |
| 21                       | 33,064   | 69.3           | <i>Gemmatimonas</i> ( <i>Gemmatimonadetes</i> )      | Poly-(R)-hydroxyalkanoic acid synthase (WP_009550222), Burkholderiales bacterium JOSHI_001         | 73           | KT944267          |
| 23                       | 42,865   | 69.6           | <i>Leptothrix</i> ( <i>̑</i> -Proteobacteria)        | Poly-(R)-hydroxyalkanoic acid synthase (WP_009550222), Burkholderiales bacterium JOSHI_001         | 74           | KT944268          |
| 25                       | 41,012   | 66.8           | <i>Variovorax</i> ( <i>̑</i> -Proteobacteria)        | Poly-(R)-hydroxyalkanoic acid synthase (WP_018902870), <i>Variovorax paradoxus</i>                 | 93           | KT944269          |
| 27                       | 37,156   | 67.0           | <i>Rubrivivax</i> ( <i>̑</i> -Proteobacteria)        | Hypothetical protein (WP_043458567), <i>Azohydromonas australica</i>                               | 73           | KT944270          |
| 51                       | 38,794   | 69.9           | <i>Rubrivivax</i> ( <i>̑</i> -Proteobacteria)        | Hypothetical protein (WP_043458567), <i>Azohydromonas australica</i>                               | 73           | KT944272          |
| P2N8                     | 22,625   | 66.3           | <i>Xanthomonadaceae</i> ( <i>̑</i> -Proteobacteria)  | Poly(3-hydroxyalkanoate) synthase (WP_028465014), <i>Nisaea dentrificans</i>                       | 55           | KT944272          |
| P11N2                    | 40,293   | 58.4           | <i>Janthinobacterium</i> ( <i>̑</i> -Proteobacteria) | Poly(3-hydroxyalkanoate) synthase (WP_041099836), <i>Sulfuritalea hydrogenivorans</i>              | 73           | KT944278          |
| P1N3                     | 32,797   | 68.6           | <i>Variovorax</i> ( <i>̑</i> -Proteobacteria)        | Poly(3-hydroxyalkanoate) synthase (WP_028253507), <i>Variovorax</i> sp. URB0020                    | 86           | KT944273          |
| P4N10                    | >2,724   | 64.2           | <i>Leptothrix</i> ( <i>̑</i> -Proteobacteria)        | Polyhydroxyalkanoate synthase (AAD10274), <i>Azohydromonas lata</i>                                | 72           | KT944276          |
| P8N7                     | >5,619   | 67.6           | <i>Sphingomonadaceae</i> ( <i>̑</i> -Proteobacteria) | Poly-(R)-hydroalkanoic acid synthase (WP_033922275), <i>Sphingomonas</i> sp. 37zxx                 | 67           | KT944277          |
| <b>Class II</b>          |          |                |                                                      |                                                                                                    |              |                   |
| 16 (PhaC <sub>1a</sub> ) | 33,900   | 66.1           | <i>Methylibium</i> ( <i>̑</i> -Proteobacteria)       | PhaC1 synthase (AHL43537), <i>Pseudomonas</i> sp.F15                                               | 48           | KT944263          |
| 50 (PhaC <sub>1a</sub> ) | 22,965   | 67.0           | <i>Hydrocarboniphaga</i> ( <i>̑</i> -Proteobacteria) | Polyhydroxyalkanoic acid synthase (WP_007929265), <i>Pseudomonas</i> sp. GM17                      | 46           | KT944271          |
| 1 (PhaC <sub>1c</sub> )  | 42,747   | 60.0           | <i>Pseudomonas</i> ( <i>̑</i> -Proteobacteria)       | Poly(R)-hydroxyalkanoic acid synthase (WP_033055349), <i>Pseudomonas mandelii</i>                  | 98           | KT944254          |
| 2                        | 59,765   | 59.1           | <i>Pseudomonas</i> ( <i>̑</i> -Proteobacteria)       | Poly(R)-hydroxyalkanoic acid synthase (WP_033055349), <i>Pseudomonas mandelii</i>                  | 98           | KU729001          |
| 15                       | 59,765   | 59.1           | <i>Pseudomonas</i> ( <i>̑</i> -Proteobacteria)       | Poly(R)-hydroxyalkanoic acid synthase (WP_033055349), <i>Pseudomonas mandelii</i>                  | 98           | KU728996          |
| 5                        | 37473    | 66.3           | <i>Burkholderia</i> ( <i>̑</i> -Proteobacteria)      | Poly-beta-hydroxybutyrate polymerase (WP_051556988), <i>Geodermatophilaceae bacterium</i> URHB0062 | 53           | KT944257          |
| 7                        | >407     | 65.6           | <i>Pseudomonadaceae</i> ( <i>̑</i> -Proteobacteria)  | Poly(R)-hydroxyalkanoic acid synthase (WP_008439266), <i>Pseudomonas</i> sp. Ag1                   | 100          | KT944259          |
| 10                       | >404     | 63.9           | <i>Pseudomonas</i> ( <i>̑</i> -Proteobacteria)       | PHA synthase (BAE07114), uncultured bacterium                                                      | 98           | KT944261          |
| 20                       | 30,964   | 66.8           | <i>Salinibacter</i> ( <i>Bacteroidetes</i> )         | Poly(R)-hydroxyalkanoic acid synthase (WP_011354994), <i>Burkholderia lata</i>                     | 59           | KT944266          |
| <b>Unclassified</b>      |          |                |                                                      |                                                                                                    |              |                   |
| P2N10                    | >13,508  | 66.6           | <i>Alcagenaceae</i> ( <i>̑</i> -Proteobacteria)      | Poly-R-hydroxyalkanoic acid synthase PhaE (EGV16635), <i>Thiocapsa marina</i> 5811                 | 27           | KT944275          |
|                          |          |                |                                                      | Poly-beta-hydroxybutyrate polymerase PhaC (WP_002708071), <i>Thiothrix nivea</i>                   | 43           | KT944275          |
| 16 (PhaC <sub>2a</sub> ) | 33,900   | 66.1           | <i>Methylibium</i> ( <i>̑</i> -Proteobacteria)       | Esterase (WP_043292995), <i>Burkholderia vietnamiensis</i>                                         | 53           | KT944263          |
| 50 (PhaC <sub>2a</sub> ) | 22,965   | 67.0           | <i>Hydrocarboniphaga</i> ( <i>̑</i> -Proteobacteria) | Esterase (WP_043292995), <i>Burkholderia vietnamiensis</i>                                         | 53           | KT944271          |

The PhaC proteins were classified based on their amino acid sequences. Possible origin of cloned metagenomic DNA was predicted by PhyloPythia.

Table 4. Biosynthesis of SCL- and/or -MCL PHAs by 11AW metagenomic clones in *Pseudomonas putida*.

| <i>P. putida</i> | Carbon sources | PHA content (%) | PHA composition (mol%) |      |      |      |      |      |      |
|------------------|----------------|-----------------|------------------------|------|------|------|------|------|------|
|                  |                |                 | 3HB                    | 3HV  | 3HHx | 3HP  | 3HO  | 3HN  | 3HD  |
| Class II         |                |                 |                        |      |      |      |      |      |      |
| PpUW1            | Octanoate      | 30.0            |                        |      | 0.7  |      | 99.3 |      |      |
|                  | Nonanoic acid  | 45.0            |                        |      |      | 19.1 |      | 80.9 |      |
|                  | Gluconic acid  | 1.7             |                        |      |      |      | 21.1 |      | 76.8 |
| PpUW2 (clone 1)  | Octanoate      | 32.7            |                        |      | 4.5  |      | 95.5 |      |      |
|                  | Nonanoic acid  | 23.4            |                        |      |      | 42.0 |      | 58.1 |      |
|                  | Gluconic acid  | 8.2             |                        |      |      |      | 20.4 |      | 79.6 |
| PpUW2 (clone 16) | Octanoate      | 25.1            | 17.3                   |      | 39.3 |      | 43.2 |      |      |
|                  | Nonanoic acid  | 46.5            | 3.4                    | 40.9 |      | 55.4 |      |      |      |
|                  | Gluconic acid  | 4.5             |                        |      | 47.6 |      | 52.4 |      |      |
| PpUW2 (pJC123)   | Octanoate      | 17.5            | 13.9                   |      | 30.3 |      | 51.3 |      |      |
| PpUW2 (pJC157)   | Octanoate      | 32.5            | 14.5                   |      | 33.9 |      | 49.3 |      |      |
| PpUW2 (clone 20) | Octanoate      | 17.6            |                        |      | 17.3 |      | 82.7 |      |      |
|                  | Nonanoic acid  | 45.0            |                        | 7.5  |      | 50.2 |      | 42.3 |      |
|                  | Gluconic acid  | 3.9             |                        |      | 9.9  |      | 37.4 |      | 52.7 |
| Class I          |                |                 |                        |      |      |      |      |      |      |
| PpUW2 (clone 14) | Octanoate      | 41.8            | 98.9                   |      | 1.1  |      |      |      |      |
|                  | Nonanoic acid  | 59.4            | 6.8                    | 93.2 |      |      |      |      |      |
|                  | Gluconic acid  | 81.2            | 97.9                   |      | 0.8  |      | 1.3  |      |      |
| PpUW2 (clone 18) | Octanoate      | 6.4             | 97.9                   |      | 0.5  |      | 2.4  |      |      |
|                  | Nonanoic acid  | 17.3            | 32.8                   | 67.2 |      |      |      |      |      |
|                  | Gluconic acid  | 30.7            | 100.0                  |      |      |      |      |      |      |
| PpUW2 (clone 19) | Octanoate      | 30.9            | 98.8                   |      | 0.5  |      | 0.7  |      |      |
|                  | Nonanoic acid  | 38.1            | 20.9                   | 79.2 |      |      |      |      |      |
|                  | Gluconic acid  | 12.3            | 100.0                  |      |      |      |      |      |      |
| PpUW2 (PhaC25)   | Octanoate      | 15.6            | 95.0                   |      | 2.9  |      | 2.1  |      |      |
|                  | Nonanoic acid  | 43.1            | 25.2                   | 74.9 |      |      |      |      |      |
|                  | Gluconic acid  | 4.1             | 100.0                  |      |      |      |      |      |      |

*P. putida* PpUW1 (PHA<sup>+</sup>) and PpUW2 (PHA<sup>-</sup>) carrying PHA<sup>+</sup> cosmids of 11AW metagenomic clones were grown at 30°C for 48 h in 0.1N M63 media supplemented with 0.5% octanoate, 0.5% nonanoic acid or 1% gluconic acid. PHA content was represented as relative to cell dry weight. Values were the averages of triplicate cultures. The standard deviations were <10% of the values. Abbreviations: 3HB, 3-hydroxybutyrate (C4); 3HHx, 3-hydroxyhexanoate (C6); 3HO, 3-hydroxyoctanoate (C8); 3HD, 3-hydroxydecanoate (C10).

## Supplementarys

Supplementary 1. The *pha* gene locus in 11AW metagenomic DNA clones encoding PHA synthases (PhaC) were classified based on the PhaC protein sequences.

Supplementary 2. Transposon Tn4652 in 11AW PHA<sup>+</sup> clones 2 and 15. Insertion of the Tn4652 into the *orf17* of clone 1 resulted in clone 2. Clone 15 was derived from clone 1 by the transposon insertion into the *orf19*.

Supplementary 3. Multiple sequence alignment of PHA synthases of 11AW metagenomic DNA clones. Alignment was performed with MUSCLE. The conserved amino acid residues affecting substrate specificity in Class I and II PhaC are highlighted in purple and yellow respectively. The positions of amino acids essential for PhaC activity are highlighted in green. The position of amino acid residues are marked based on PhaC<sub>16</sub> sequence. Names of Class I PhaC are in regular font, Class II PhaC in bold, and unclassified PhaC underlined. PhaC proteins with partial sequences are marked with a star.

Supplementary 4. R-specific enoyl-CoA hydratases PhaJ. (A) Phylogenetic tree was constructed with MEGA6. The bar represents substitution of amino acid residue. (B) Conserved amino acid Asp<sup>39</sup>, His<sup>44</sup> and Ser<sup>7</sup> required for activity are marked.

## Class I

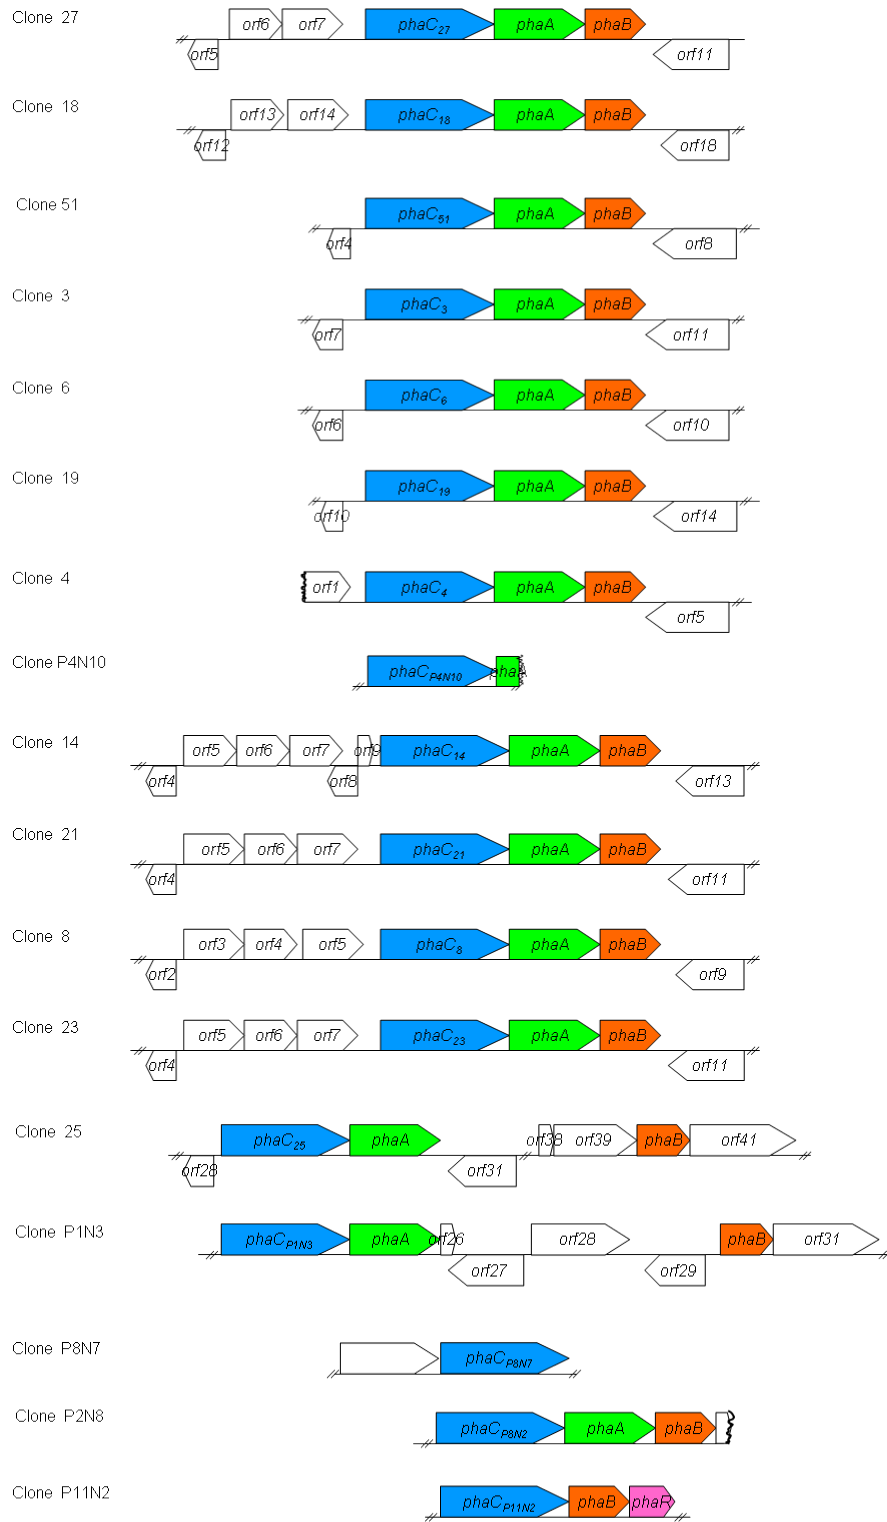



## Class II

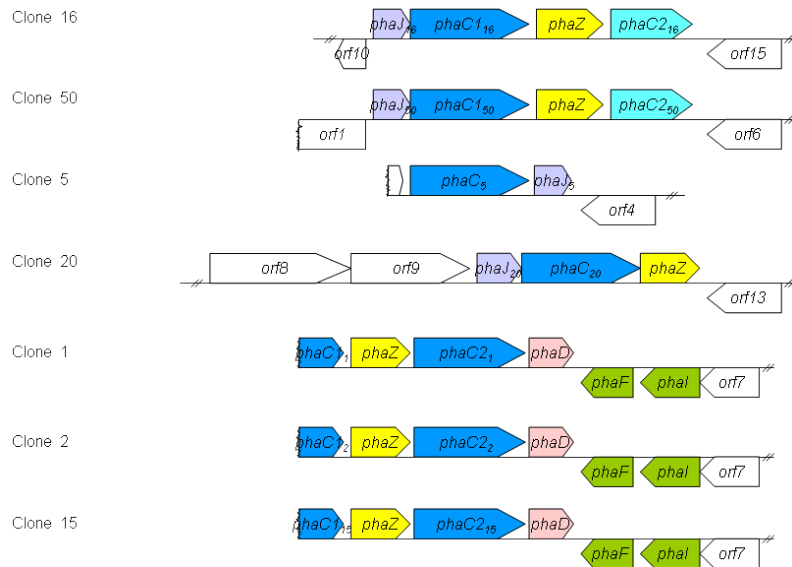

## Unclassified

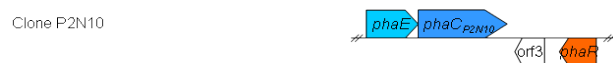

## Supplementary 1.

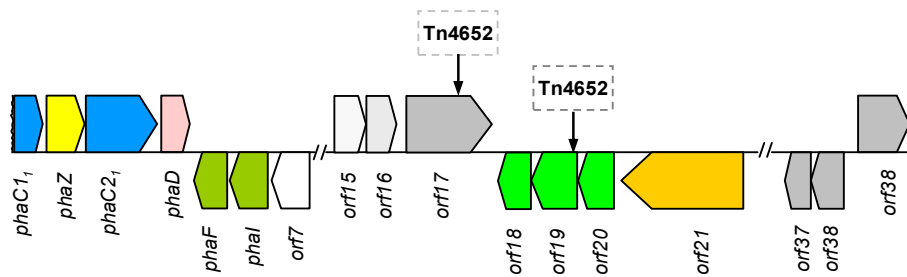

Supplementary 2.

```

PhaC21,6 -----msslpvaers-----
PhaC250 -----Mistkpvaaers-----
PhaC_P2N10* -----
PhaC11,6 MAktkgsrrrAriEseE---psrS-----EmLrlAL
PhaC150 -----MaKtkApprwarlpssprrs-----ElLrlALv
PhaC5 MAkreatknvAatev-----vggGedVG
PhaC20 --mtatRrskArEde-prakkrv-----rkVaaAVGgapkpeagEArgfae---
PhaC10* -----
PhaC21 -----mrektarefsEtPaafinaqs-----aitGlrgr
PhaC7* -----
PhaC_P11N2 MqyaghAlfqs-----fn-----QlLaagLqQ
PhaC25 MmKqgAtgada---fapfq-----QALsegwnKAlesfqgSatqgasafn
PhaC_P1N3 MrQeqgAaada---tfapfq-----QALtqgwe
PhaC14 MkskpAAsarPtkqvtDsA-----QALGhAWG
PhaC8 MkskpAAsrP-dqvaEsA-----QALGhAWG
PhaC23 MkskpAApprP-dqvaEsA-----QALGhAWG
PhaC21 MkskpAApprP-dqvaEsA-----QsLGhAWG
PhaC4 MpKtiASlPas-----A-----QAYGaAVG
PhaC_P4N10 MpKtiASlPas-----A-----QAYGaAVG
PhaC19 MsKnntklPhs-----EqA-----dAfGhAVG
PhaC6 MsKnntklPhs-----EqA-----dAfGhAVG
PhaC3 MsKnntklPhs-----EqA-----dAfGhAVG
PhaC51 MmtgdA-----dAfGkAMG
PhaC27 --mtgdA-----dAfGkAMG
PhaC18 --mtgdA-----dAfGkAMG
PhaC_P8N7 MAdpdtKapeApEIP---slEem-----QhwtwvMGRAgqmmLE
PhaC_P2N8 -----MqtenSApidPgavleElaQvaqqiqgqmrdaLdggwqQpvvdg-----

PhaC21,6 -----nLeK1L-----LAVP-----ayW---
PhaC250 -----nLeKAL-----LAFp-----pyW---
PhaC_P2N10* -----MiLP-----glAaAaL-----QAE-----rer
PhaC11,6 ----vilgrLrGn-----pgLP-----IRhiagfakef
PhaC150 ----ifgRlrrn-----pALP-----IRhiaafakel
PhaC5 ----vlsprS1-----Teaa-----tsAMNpL-----tmaRESarLygew
PhaC20 ----rvvdAIPG-----pnPfvvgfSvEdvlssaeQLvagalQpglVlrnqaaafGd
PhaC10* -----
PhaC21 ----dLFsTLrs-----vaAhglr-----npvhtarhalklgGq
PhaC7* -----
PhaC_P11N2 ----ssveltng-----LSht-----gtaasasvmal-----QeEwqarhmQLWqGm
PhaC25 vtgggtLWqipqt-----aSMp---elpkisdpekLqsi-----QqQYVaEATELWrrqg
PhaC_P1N3 ----kaleAfqslgKApqadMPwdmprfsfsasrLqEL-----QrhYTeEATELWrrqd
PhaC14 ----eMwKsAvG-----LSLP-----tdAMSEL-----QtrYVKQATELWNqa
PhaC8 ----hMwKsVAG-----MSLP-----atAMTEL-----QSnYLKQATELWNqt
PhaC23 ----dMwKsVAG-----MSLP-----atAMTEL-----QSnYLKQATELWNqt
PhaC21 ----qMwKsVAG-----MSLP-----atAMTEL-----QSnYLKQATELWNqt
PhaC4 ----diWKSMSe-----LNLp-----1FALSEL-----QSnYVKQATEIWNga
PhaC_P4N10 ----diWKSMSe-----LNLp-----1FALSEL-----QSnYVKQATEIWNga
PhaC19 ----diWKSMSqG-----LSLP-----1FALSEL-----QtEYLKDAtaLWNga
PhaC6 ----diWKSMSqG-----LSLP-----1FALSEL-----QtEYLKDVtaLWNga
PhaC3 ----diWKSMSqG-----LSLP-----1FALSEL-----QtEYLKDAtaLWNga
PhaC51 ----rMlqAaAG-----LTLp-----ptALTDL-----QAEYLREATEMWNga
PhaC27 ----rMlqAaAG-----LTLp-----psALTDL-----QAEYLREATEMWNga
PhaC18 ----rMlqAaAG-----LTLp-----psALTDL-----QAEYLREATEMWNga
PhaC_P8N7 ----hvaRAMgetaEAkapALP---w1TLfGdpakLAQq-----QAElwteGlaIWqra
PhaC_P2N8 ----pvlNSMAG---gllqALavfnqSlfAdparLlQa-----QAKlwdgyaQLWqrg

PhaC21,6 -----piEW-----ar
PhaC250 -----piEW-----tk
PhaC_P2N10* LDaLlGasaea-----vsWpdrSAAcLpv-----eg
PhaC11,6 LniLrgksdv---tpaagDKRFAdaaWSgNrlSgalvQvYiaasqeayaLvkeLEl-eg
PhaC150 LrvLrnksev---ApsagDKRFtdaaWSdrrwSSalvQvYLaasqeayaLvneLEl-Dg
PhaC5 LKilvgrser---dvFvkDwRFAdptWhehPAYkrTAQgYLaafcdaidRviDgnp--Dw
PhaC20 LaRLlsgrstl---epeeGDRRFqdptWkeNPFyraglQtYLaWrkqvhrLvegagL-Da
PhaC10* LgRvllgetlh---ptnpgDnRFAdpaWS1NPfyrrSlQaYLSwqkevkhwiDdsnm-tp
PhaC21 -----
PhaC7* -----
PhaC_P11N2 LQsngaateFva---qslpgDRRFshpaWaesFiydylrQaYLLINadyLqRLADtap--eg
PhaC25 fa-----akFegDRRFASdaWgSNP1SAfSAavYLLNgRTLlnMADAIDa-De
PhaC_P1N3 ia-----ArthgDRRFAAeaWgSNPVAafSAavYLLNtRTLlGMaeAVEG-Da
PhaC14 LaRLqpdGakETAPAAFitDKRFAPaEWSANPATAyTAQmYLLNARTLMQLAesMQG-Da
PhaC8 LsRLqpEGatETAaAtFitDKRFAPaEWSANPASAyTAQmYLLNARTLMQLAesMQG-Da
PhaC23 LsRLqpEGatETAaAtFitDKRFAPaEWSANPASAyTAQmYLLNARTLMQLAesMQG-Da
PhaC21 LsRLqpEGatETAaAtFitDKRFAPaEWSANPASAyTAQmYLLNARTLMQLAesMQG-Da
PhaC4 vERLqadGets---kkFlpDRRFANeEWAANPvSALTAQiYLLNARTLLQMADAIEG-De
PhaC_P4N10 vERLqadGets---kkFlpDRRFANeEWAANPvSALTAQiYLLNARTLLQMADAIEG-De
PhaC19 vERLktDesqt---AvaprDRRFAAEeWASNPAAAMAaQtYLLNARTLMKMADAIEG-Dt
PhaC6 vERLktDeskt---AvaprDRRFAAEeWASNPAAAMAaQtYLLNARTLMKMADAIEG-Dt
PhaC3 vERLktDeskt---AvaprDRRFAAEeWASNPAAAMAaQtYLLNARTLMKMADAIEG-Dt
PhaC51 vERfsgkaPeQ---AqkigDRRFANdWAANPATALaAqaYLLNsRTLmKMADAIEQ-Da
PhaC27 vERfsgkaPeQ---ShkigDRRFANdWAANPATALaAqaYLLNsRTLmKMADAIEQ-Da
PhaC18 vERfsgkaPeQ---ShkigDRRFANdWAANPATALaAqaYLLNsRTLmKMADAIEQ-Da

```

PhaC\_P8N7 Lg--vdsGPrtelvekadrDRRFAApQWreNPlfdMirQsYLLlvserLLgsvDsIDGLDp  
PhaC\_P2N8 LgaLgtqgvEpaagEptaptDRRFRaQDWql-PAfdLirQwYLLtsqwlLEqvtgagcLDp

120

PhaC2<sub>16</sub> qiRkRgtklprdwlyVraagaItf-PD-----Rpd--wVt  
PhaC2<sub>50</sub> qiRqRgmrlpldwVsyVreakaItf-PD-----KpG--wVt  
PhaC\_P2N10\* KaR-----  
PhaC1<sub>16</sub> rdaSaaRFlstmlVeALaPSNnplntNFvvlKrvrETRgkSllrGfOHfLsDrdlnaGmIS  
PhaC1<sub>50</sub> rdaSsaRFlatmlVeAMaPSNnplntNFvvmqrvrETKGrSllrGLOHfLsDrdlnaGmIS  
PhaC5 rkReRaRFltgiltsAMaPtNtLigNFAAlKKAyETgGkSlvrGvQnLIDDVRhnkGmpS  
PhaC20 KgteRaRfvaslmtALaPtNEflgNFAAiKrALETgGgSllrGLanLfDDVatngGmpS  
PhaC10\* -----  
PhaC2<sub>1</sub> ddRARahFAfallnDAMaPSNsL-LNFIAiKeifnsgGnSlvrGisHLvDDllhndGlpr  
PhaC7\* -----  
PhaC\_P11N2 qiRnRmQFlthQaIDAMaPSNFAAtNPEfiKtAlaTeGESIrlGiQnLLqDlEkG--rIS  
PhaC25 KTKARLRFAVEQWmaAsSPSNsLafNaEAQKKAIdTqGESIAkGiQnLLhDVKQG--HlS  
PhaC\_P1N3 KTRARLRFAVEQWVaAsSPSNYLafNaEAQKKALESqGESIAkGiQnLLkDVQQG--HlS  
PhaC14 KTKARVRFAVQQWVDAMSPaNFMALNPEAQKKALdTKGESVSGiQqLLNDlRkG--aVS  
PhaC8 KTKARVRFAVQQWVDAMSPaNFMALNPEAQKKALdTKGESVAQGLQqLfnDlRkG--sVS  
PhaC23 KTKARVRFAVQQWVDAMSPaNFMALNPEAQKKALdTKGESVAQGLQqLfnDlRkG--sVS  
PhaC21 KTKARVRFAVQQWVDAMSPaNFMALNPEAQKKALdTKGESVAQGLQqLfnDlRkG--sVS  
PhaC4 KTRqRIRFAVQQWVeAaSPSNYLALNPEAQrKALETKGESITqGLLHLWqDVQQG--HVS  
PhaC\_P4N10 KTRqRIRFAEQWGeAarrSNYVALNPEAQrKALETKGESITqGLLHLWqDVQQG--HVS  
PhaC19 KTRARIRFAVQQWVDAaSPSNYLALNPEAQrKALETRGESIAQGLRqLwDDIQG--HVS  
PhaC6 KTRARIRFAVQQWVDAaSPSNYLALNPEAQrKALETRGESIAQGLRqLwDDIQG--HVS  
PhaC3 KTRARIRFAVQQWVDAaSPSNYLALNPEAQrKALETRGESIAQGLRqLwDDIQG--HVS  
PhaC51 KTKARVRFAVQQWIDAaSPSNYLafNPEAQrKALETKGESIAQGLaHLlGDIQQG--HVS  
PhaC27 KTKARVRFAVQQWIDAaSPSNYLafNPEAQrKALETKGESIAQGLaHLlGDIQQG--HVS  
PhaC18 KTKARVRFAVQQWIDAaSPSNYLafNPEAQrKALETKGESIAQGLaHLlGDIQQG--HVS  
PhaC\_P8N7 KqRekLRfMtrnfVDAMaPSNFAAtNFvvlrAMaTRGESllkGLEHmLDDVskG--qIt  
PhaC\_P2N8 aTRhkLaFytrQfaDALSPSNFvAtNPEvIratvEsgGqnllhGfRHRvLEDMrGgGrId

PhaC2<sub>16</sub> -----pntiayEsqtmLrnfsdpvvsadtiPviidaPfaghPstIa  
PhaC2<sub>50</sub> -----phtiaFETqtmwLrdfsdadApadaiPvividPyaghPstIa  
PhaC\_P2N10\* -----LLcYpsLrepa-aRPLlLlVyslVNr-ihvL  
PhaC1<sub>16</sub> --mvDrtaFEVGRNVaTpGdVVFrNEvleLLqYKpqsAeVyiPiLmvVPPqINK--YYvL  
PhaC1<sub>50</sub> --mvDrtPFEVGRNVaTpGdVVFrNEvceVlqYKpQtaeVysiPlvVPPqINK--fYvL  
PhaC5 --QvkrSdFkVGENlaaTpGAVVlrtErleLlqYqPtTAKVyaiPtLiIPPPtGk-hYfi  
PhaC20 --QvDkSaFrVGENlaaTpGAVVfRNEvleiqYaPagAqVygRPLlLVPPqINK--YYvi  
PhaC10\* -----  
PhaC2<sub>1</sub> --QvtkqaFEVGktVATTtGsVVFrNELleLiqYKPMseKqysKPLlLVPPqINK--YYIf  
PhaC7\* -----  
PhaC\_P11N2 --mTDEaaFEiGRNlAvTsGsVVFENEQliqYaPLTpKVaaRPLviVPPCINK--fYIL  
PhaC25 --mTDESaFEVGRNVATTEGAVVFENELFQLLEYKPLTpkVyERPllLVPPCINK--YYIL  
PhaC\_P1N3 --mTDESaFEVGRNVATTEGAVVFENELFQLLEYKPLTAKVYERPllLVPPCINK--fYIL  
PhaC14 --QDTEtVFEVGRNVATsEGAVVFENELFQLiEYKPLTgKIhtRPMLFVPPCINK--YYIL  
PhaC8 --QDTEsVFEVGRNVATsEGAVVFENELFQLiEYKPLTAKVhtRPMLFVPPCINK--fYIL  
PhaC23 --QDTEsVFEVGRNVATsEGAVVFENELFQLiEYKPLTAKVhtRPMLFVPPCINK--fYIL  
PhaC21 --QDTEsVFEVGRNVATsvGAVVFENELFQLiEYKPLTAKVhtRPMLFVPPCINK--fYIL  
PhaC4 --QDTEsVFEVGRNVATTEGAVVFENELFQLiEYKPLTdkVHhtPFLFVPPCINK--YYIL  
PhaC\_P4N10 --QDTEsVFEVGRNVATTEGAVVFENELFQLiEYKPLTdkVHhtPFLFVPPCINK--YYIL  
PhaC19 --QDTEsVFEVGRNVATsEGAVVFENELFQLLEYKPLTAqVHERPMLFIPPCINK--YYIL  
PhaC6 --QDTEsVFEVGRNVATsEGAVVFENELFQLLEYKPLTAqVHERPMLFIPPCINK--YYIL  
PhaC3 --QDTEsVFEVGRNVATsEGAVVFENELFQLLEYKPLTAqVHERPMLFIPPCINK--YYIL  
PhaC51 --QDTEsVFEVGRNVATTEGAVVFENELFQLLEYKPLTAqVHERPMLFVPPCINK--YYIL  
PhaC27 --QDTEsVFEVGRNVATTEGAVVFENELFQLLEYKPLTAqVHERPMLFVPPCINK--YYIL  
PhaC18 --QDTEsVFEVGRNVATTEGAVVFENELFQLLEYKPLTAqVHERPMLFVPPCINK--YYIL  
PhaC\_P8N7 --hTDpeaFEVGRNiAvTpGkVVkrtpLYeLiqYsPtTetVygtPlvifPPwInR--fYIL  
PhaC\_P2N8 prnTDpnaFEVGAiNaAtpGkVVfQnGlmQliqYtPvTdqVyrRPLlLVPPwINK--fYvm

229

PhaC2<sub>16</sub> DyadggLlvqtlkagGcKRVyVtdWksatheMrnfgiDkYlsDld---QaIdAVgGRa-  
PhaC2<sub>50</sub> DyadggLlvqtlkagGcKRLyVtdWksathaMrnfgiDkYlaD--LR--daVdhVgGRa-  
PhaC\_P2N10\* DLlarchaFierlqglG-HpVylvdWgrPdaSdAglsIaDYvcgylstAVRLVrrhgcaR-  
PhaC1<sub>16</sub> DLsPgNsfvnYaVKQG-fqVfMvSWRNPgpeLAhlsldhYlr-GleeAhnaVmeITGak-  
PhaC1<sub>50</sub> DLsPgNsfvnYaVKQG-fqVfMvSWRNPgpeLAyIsIghYlQ-aledAhRaVmeITGad-  
PhaC5 DLsPgrsiveYaVakG-fqVfCISWRNPqveqgdwgiDDYI-gsmLeAVdaVckITGsK-  
PhaC20 DLsPgksLveYaVasG-icfFaVSWRNPtvaerdwglletYll-alseAIdaVceITGsE-  
PhaC10\* -----FmVSWRNPtkaqrewglstYIE-alkaAVdVVsAITGsK-  
PhaC2<sub>1</sub> DLsPhNfvqfalKnG-lqtFmISWRNPdvrhrewglssYVE-aveeAmnVcrAITGaR-  
PhaC7\* -----VfVvSWRNPdvrhrewglstYVa-aleeAlnVtrAITGaR-  
PhaC\_P11N2 DLQPENSlvRYaVEQG-ntVfMvSWRNVqadLghlTWDDYIEqGaLKAIRVaQcIcrvp-  
PhaC25 DLQPENSLIRYanEQG-HRVFVvSWRNPDeSLAnaTWDDYIEnaaIKAIhtVQdISGsK-  
PhaC\_P1N3 DLQPENSLIRYanVEQG-HRtFVvSWRNPdaSmsqyTWDDYIEDaaIKAIQvtreITGQdk  
PhaC14 DLQPENSLIRYtVEQG-HRVFvMvSWRNPDeSLAayTWDDYIEkGpLKAIEvVQqIGGQK-  
PhaC8 DLQPENSLIRYtVEQG-HRVFvMvSWRNPDeSLAhfTWDDYIEkGpLKAIEvVQqIGGQK-  
PhaC23 DLQPENSLIRYtVEQG-HRVFvMvSWRNPDeSLAhfTWDDYIEkGpLKAIEvVQqIGGQK-  
PhaC21 DLQPENSLIRYtVEQG-HRVFvMvSWRNPDeSLAhfTWDDYIEkGpLKAIEvVQqIGGQK-  
PhaC4 DLQPENSLIRwTVEQG-HRlFvMvSWRNPdSVAakTWnDYIEDGtIRAIeVvreITGaE-  
PhaC\_P4N10 DLQPENSLIRwTVEQG-HRlFemSWRNPdSVAakTWnDYIEDGtIRAIeVvreITGaE-  
PhaC19 DLQPENSLIRYtVaQG-HRtFVvSWRNPdSIAakTWDDYIDGaIRAIReVQAISGQa-

PhaC6 DLQPDNSLIRYTVaQG-HRtFVVSWRNPdPSIAakTWDDYIDDGaIRAIReVQAISGQa-  
 PhaC3 DLQPDNSLIRYTVaQG-HRtFVVSWRNPdPSIAakTWDDYIDDGaIRAIReVQAISGQa-  
 PhaC51 DLQPDNSLIRwTVgQG-HRtFVVSWRNPdPSIAadkTWDDYIEDGaIRAIgeVQSISGQK-  
 PhaC27 DLQPDNSLIRwTVgQG-HRtFVVSWRNPdPSIAadkTWDDYIEDGaIRAIReVQSISGQK-  
 PhaC18 DLQPDNSLIRwTVgQG-HRtFVVSWRNPdPSIAadkTWDDYIEDGaIRAIReVQSISGQK-  
 PhaC\_P8N7 DLnPKKkFIRwaVEQG-ltVfVVSWSksaDeSLAgtLDDYVlgGqVdAIdtIrel1GvE-  
 PhaC\_P2N8 DLQPKNSLvggw1QQG-ytVfMlSWiNpGqQLAeksfeDYmiEGpLaAldaIEqacGER-

287

318

Lipase box

PhaC2<sub>16</sub> ----hlv61cggGwLs----AMhAARfp-gkAvSLvLagapiDthAgh-Gpvtkmaqrt  
 PhaC2<sub>50</sub> ----hlv61cggGwLst----MLAARyp-dkvvSLvLagapiDthAgD-Gpvtklskrt  
 PhaC\_P2N10\* ---tIdlLGiCqGGs-LAlcLAsLepRal----nrLvtLvTpvDFh--tpG--DVlaDlA  
 PhaC1<sub>16</sub> ---KVsfgClCaGgltSAiAlGryAdqGkldtvntLTlnvTLLDiSgmEktnmgyFltpe  
 PhaC1<sub>50</sub> ---KVNfkClCaGgltSAiAlGryAdqGkldtvntLTlnvTLLDiSgmEktnmgyFltpe  
 PhaC5 ---KVNisFCaGgimttmLsyyAAvrd-krvnaaafgvmLLDFd--teapigalhsrk  
 PhaC20 ---RVNTLaaCaGgitLmlLsYLAeGD-rvrnSvTLVTLdte--aeGvLgLFasEe  
 PhaC10\* ---dInmLgaCsGgitctalLghyAALGE-kkvnaLTLVsvLdtT--ldtqvaLFVDEq  
 PhaC2<sub>1</sub> ---EVNLMGaCaGgitLAalqghLqAkRQLrrvSSaTyLvsLLDsq--mdspatLFADEq  
 PhaC7\* ---EVNLMGaCaGgitLAalqghLqAkRQLrrvSSaTyLvsLLDsq--idspatLFADEq  
 PhaC\_P11N2 ---QVNaLGFVCGGTILssALAVArLRGE-dPvASLTLTLTLLDfS--DsGeigyFVDEA  
 PhaC25 ---QVNLGFCVCGGTILsTALAVLAARGE-kPASSvTLTLTfLDfS--DTGiLDIFVDEp  
 PhaC\_P1N3 ---kggQIdTLFCVCGGTILsTALAVLAARGE-QPASSvTLTLTLLDfE--DTGiLDIFIDEg  
 PhaC1<sub>4</sub> ---tfNmLGFVCGGTILATALAVLAARGQ-QPAhSLTLTLTLLDfK--hTgVLDVfVDEp  
 PhaC8 ---QfNmLGFVCGGTILATALAVLAARGE-QPAhSLTLTLTLLDfK--hTgVLDVfVDEp  
 PhaC23 ---QfNmLGFVCGGTILATALAVLAARGE-QPAhSLTLTLTLLDfK--hTgVLDVfVDEp  
 PhaC21 ---EfNmLGFVCGGTILsTALAVLAARGE-QPAhSLTLTLTLLDfK--hTgVLDVfVDEp  
 PhaC4 ---RlNTLGFVCGGTILATALAVLAARGD-QPAASvTLTLTALLDfS--ETGvLDLFIIDEp  
 PhaC\_P4N10 ---RlNTLGFVCGGTILATALAVLAARGD-QPAASvTLTLTALLDfS--ETGvLDLFIIDEp  
 PhaC1<sub>9</sub> ---tIdTLGFVCGGTILtTALAVLAARGE-QPAASLTLTLTLLDfA--DTGvLDIFIDEA  
 PhaC6 ---tIdTLGFVCGGTILtTALAVLAARGE-QPAASLTLTLTLLDfA--DTGvLDIFIDEA  
 PhaC3 ---tIdTLGFVCGGTILtTALAVLAARGE-QPAASLTLTLTLLDfG--DTGvLDIFIDEA  
 PhaC51 ---QIdvLGFVCGGTILATALAVLAARGE-QPAASLTLTLTLLDfS--NTGvLDIFIDEA  
 PhaC27 ---QIdvLGFVCGGTILATALAVLAARGE-QPAASLTLTLTLLDfS--NTGvLDIFIDEA  
 PhaC18 ---QIdvLGFVCGGTILATALAVLAARGE-QPAASLTLTLTLLDfS--NTGvLDIFIDEA  
 PhaC\_P8N7 ---sVhaIGYCVaTtLAatLALLeARGEadkvASaTffTaqvDfS--EaGdLnLFVade  
 PhaC\_P2N8 ---EVNavGYCIgGTLlStLAymtAvnD-ErikSaTtfaSLDfS--DpGdLgVFIDEA

PhaC2<sub>16</sub> pfnfyrs1Va---mGgGrmRGrfmlqgwknhmFdehyWgkyidldfdnitrPqyveRARH  
 PhaC2<sub>50</sub> plsfyrsVmVa---mGgGrmRGrfmlqgwknhmFdehyWgkyidldfdnitrPqyvsRARH  
 PhaC\_P2N10\* rVldlpalLapd----GnLpGavLagLFGmLRFlrgVgaarapwldgGaEPekleRlRr  
 PhaC1<sub>16</sub> glEtsmkrskKE----GvLyGhEmAkMFawLRPNdLVWNYwVnNYLmGKKPaaFD----  
 PhaC1<sub>50</sub> glEksmkrskQE----GvLyGhEmAkMFawLRPNdLVWNYwVnNYLmGKKPaaFD----  
 PhaC5 lIqVasrsraKk----GIhpassLAqVfawmRPNDLVWNYwVnNYLmGQdPPSFD----  
 PhaC20 aVaLaklnswtk----GvLpGEElgrvFawLRPNdLVWNYwVnNYLmGnaPPaFD----  
 PhaC10\* tLEaakrshyQa----GvLEGrDmAkVfawmRPNDLi-----  
 PhaC2<sub>1</sub> tLEaakrshyQk----GvLdGrDmAkVfawmRPNDLiWsfVnNYLmGKEPPaFD----  
 PhaC7\* tLEaakrshyQq----GvLdGrDmAkVfawmRPNDLi-----  
 PhaC\_P11N2 sVaareagIG----QG-GLLhGrELATvFSaLRaNDLiWqYVVGNYLKGgKPPaFD----  
 PhaC25 mVayrEmqLG----kG-GLLpGmDLAsTFsFLRPNDLVWNYVVGNYLKGgEtpPPFD----  
 PhaC\_P1N3 fVrfrEmqMn----aG-GLLpGsELAsTFsFLRPNDLVWNYVVGNYLKGgEtpPPFD----  
 PhaC1<sub>4</sub> sVQLREvTIGEQAfNgPGLLKGkELATTFsFLRPNDLVWNYVVGNYLKGaEaPPFD----  
 PhaC8 aVQMREmTLGEQAfNgPaLLKGkELATTFsFLRPNDLVWNYVVGNYLKGaEaPPFD----  
 PhaC23 tVQMREmTLGEQAfNgPaLLKGkELATTFsFLRPNDLVWNYVVGNYLKGaEaPPFD----  
 PhaC21 sVQMREmTIGEQAfNgPaLLKGkELATTFsFLRPNDLVWNYVVGNYLKGaEaPPFD----  
 PhaC4 aVQMRaTIGpQsFnGcGLLKGQELATTFsFLRPNDLVWNYVVGNYLKGaEaPPFD----  
 PhaC\_P4N10 aVQMRaTIGpQsFnGcGLLKGQELATTFsFLRPNDLVWNYVVGNYLKGaEaPPFD----  
 PhaC1<sub>9</sub> aVQLREmTLGEQAfNgPaLLKGQELATTFsFLRPNDLVWNYVVGNYLKGaKPPFD----  
 PhaC6 aVQLREmTLGEQAfNgPaLLKGQELATTFsFLRPNDLVWNYVVGNYLKGaKPPFD----  
 PhaC3 aVQLREmTLGEQAfNgPaLLKGQELATTFsFLRPNDLVWNYVVGNYLKGaKPPFD----  
 PhaC51 qVQLREaTIGldAPQGfPGLLKGQELATTFsFLRPNDLVWNYVVGNYLKGDKPPFD----  
 PhaC27 qVQLREaTIGldAPQGfPGLLKGQELATTFsFLRPNDLVWNYVVGNYLKGDKPPFD----  
 PhaC18 qVQLREaTIGldAPQGfPGLLKGQELATTFsFLRPNDLVWNYVVGNYLKGDKPPFD----  
 PhaC\_P8N7 tLQlVeqisaDk----GyLdGrymAAtnLrgrDLiWsfVnNYLmGEdyaPPFD----  
 PhaC\_P2N8 qLEalEgkMa----GaGyLdsADmATaFnLrANdLVWsfVnNYLmGEdPaPPFD----

391

445

PhaC2<sub>16</sub> farVYehvvdLPGrMYLeavkHlflk1NrLar-GEfvalGERisLksLavPVYllAgadD  
 PhaC2<sub>50</sub> fasVYehvvdLPGrLYLeavkHlflk1NrLar-GEfvalGERisLksLttvPVYllAgadD  
 PhaC\_P2N10\* lvaYqgDypdqGraWlftvtacYreNrLlk-GtLvlDgHtVdLRlRlRlPvlnvfaRaDh  
 PhaC1<sub>16</sub> vLYWNSDSTRLPaaLHhdfc-dmvakNELnggevyq1pdaqVDLsRvDvesfIvAgRtDh  
 PhaC1<sub>50</sub> vLYWNSDaTrLPaaLHrdfc-ellktNELgrgevyqVedaKVDLrKvDvdsfVvAgRtDh  
 PhaC5 iLaYsvDgTNLPgkLHgqfL-dlfeNaLpkkGsinllGkplDLesIkvetlvTggttDh  
 PhaC20 vLYWnDnDtTrLPaaLHgfL-dlflNpfrNpdaLellGkpiDvanvskdavYvAgttDh  
 PhaC10\* -----  
 PhaC2<sub>1</sub> iLYWnDnDtTrLPaaLHgdL-dffkhNpLshPGLeVCGtpiDLqKvNvdsfsvAginDh  
 PhaC7\* -----  
 PhaC\_P11N2 LLYWNSDSTNLPgfLltWYLRnmYLeNnLriPGKLamCGvKaDLGhvDmPsfVvAcREdH  
 PhaC25 LLYWNSDaTNLPGEfYtWYLRnTYheNkLakPnaLTVCGEKiDLGKIDiPaYIYgSREdH  
 PhaC\_P1N3 LLYWNSDaTNLPgPMYCWYLRnTYheNkLapVgaLTVaGeqVDLGRIEAPVYIYgSREdH  
 PhaC1<sub>4</sub> LLYWNgDSTNLPgPMYCWYLRHTYlqNELrqpGKLTVCGEKiDLGaIDAPVYIYgSREdH

PhaC8 LLYWNgDSTNLPGPMYCWYLRHTYLTNELRqPGKLTVCGEKiDLGaIDAPVYIYgSREDH  
 PhaC23 LLYWNgDSTNLPGPMYCWYLRHTYLTNELRqPGKLTVCGEKiDLGaIDAPVYIYgSREDH  
 PhaC21 LLYWNgDSTNLPGPMYCWYLRHTYLTNELRqPGKLTVCGEKiDLGaIDAPVYIYgSREDH  
 PhaC4 LLYWNSDSTNLPGfLcWYLRnTYLeNkLkdpGavTVCGEKVDLGAIEAPVYIYsSREDH  
 PhaC\_P4N10 LLYWNSDSTNLPGfLcWYLRnTYLeNkLkdpGavTVCGEKVDLGAIEAPVYIYsSREDH  
 PhaC19 LLYWNSDSTNLPGPMFCWYLRHTYLTNELRvPGKLVVCGEKVDLGIKAPVfVYgSREDH  
 PhaC6 LLYWNSDSTNLPGPMFCWYLRHTYLTNELRvPGKLVVCGEKVDLGIKAPVfVYgSREDH  
 PhaC3 LLYWNSDSTNLPGPMFCWYLRHTYLTNELRvPGKLVVCGEKVDLGIKAPVfVYgSREDH  
 PhaC51 LLYWNgDSTNLPGPMFCWYLRHTYLTNELRqPGKLTVCQKVDLGIKAPVfVYASREDH  
 PhaC27 LLYWNgDSTNLPGPMFCWYLRHTYLTNELRqPGKLTVCQKVDLGIKAPVfVYASREDH  
 PhaC18 LLYWNgDSTNLPGEMFCWYLRHTYLTNELRqPGKLTVCQKVDLGIKAPVfVYASREDH  
 PhaC\_P8N7 LLfWNSDtTnLPakwHraYLRdfYrdNkLvraGELvVdGtpiDihKvktFtYVqAgREDH  
 PhaC\_P2N8 LLfWNaDaTrmPaaMhsfYLRnmYLnNrLRePGgiTlaGvpinLsKItvPcYfvAtvEDH

473 478

PhaC2<sub>16</sub> IttpdqvfnaenliGTPKdqIRkeLapGhIglfmgaktlKqg-----  
 PhaC<sub>50</sub> IttpegvfnaenlvGTPRdqIRkeLapGhIglfmgaktlneq-----  
 PhaC\_P2N10\* lVPaaAsqalgRai---gsrryqeLaieGcnvGV-----  
 PhaC1<sub>16</sub> ItPWdAcYKsvnLL---gGKsqFVLvnSGhIqtlvcPPgKqKaSyqT--aDvLPeDphEW  
 PhaC1<sub>50</sub> ItPWdgcYKsvnLL---gGesqFVLvnSGhIqtlvcPPgKqKaSyqT--gEtLPeDphEW  
 PhaC5 ltPWkcyYrtTQLL---gGstFVLSnaGvAslvNPPgnpKatyWl--gpKpddDpEaw  
 PhaC20 ItPWkctYatTQLL---tGereFVLsSSGhIqsIvNPPgnpKarflT--NpsfPaDpDDW  
 PhaC10\* -----  
 PhaC2<sub>1</sub> ItPWdAvYrSTlLL---gGerRFVLsnSGhIvqsIlnPPsnpKanfve--stKlsgDpraW  
 PhaC7\* -----  
 PhaC\_P11N2 lVPWRAsYrgrRLL---gGKsRFVLGASGhIAGVINPPAKgKRnyWvnqgDagkasADEW  
 PhaC25 lVPiggaYaSTQLL---pGKkRFVmgASGhIAGVINPPAKKRSHwIRddgKfPktqaEW  
 PhaC\_P1N3 lVPiggaYaSTQLL---KGKkRFVmgASGhIAGVINPPAKKRSHwIRadgKLPktqaEW  
 PhaC14 lVPWhaAAyESTtIL---ntKrrFVLGASGhIAGVINPaAKnKRSHwv--NDKLPEiADEW  
 PhaC8 lVPWhaAAyESTtIL---nsKrrFVLGASGhIAGVINPasKnKRSHWT--NDKLPEsADDW  
 PhaC23 lVPWhaAAyESTtIL---nsKrrFVLGASGhIAGVINPasKnKRSHWT--NDKLPEsADDW  
 PhaC21 lVPWqAAyESTtIL---nsKrrFVLGASGhIAGVINPasKnKRSHWT--NDKLPEsADDW  
 PhaC4 lVPWtgAAyASTaLL---RGKkRFVLGASGhIAGVINPPAKKRSHWT--NtttPkDpqrW  
 PhaC\_P4N10 lVPWtgAAyASpaLL---RGKkRFVLGASGhIAGVINPPAKKRSHWT--NtttPkDpqrW  
 PhaC19 lVPWqAAfESTKIm---KGKvRFVLGASGhIAGVINPPAaKKRSHwv--dgKlGatAqQW  
 PhaC6 lVPWqAAfESTKIm---KGKvRFVLGASGhIAGVINPPAaKKRSHwv--dgKlGatAqQW  
 PhaC3 lVPWqAAfESTKIm---KGKvRFVLGASGhIAGVINPPAaKKRSHwv--dgKlGatAqQW  
 PhaC51 lVPWqAAfESTKIL---KGKvRFVLGASGhIAGVINPPAaKKRSHwa--ggKvDgDagQW  
 PhaC27 lVPWdAAfESTKIL---KGKvRFVLGASGhIAGVINPPAaKKRSHwv--ggKvDgDagQW  
 PhaC18 lVPWdAAfESTKIL---KGKvRFVLGASGhIAGVINPPAaKKRSHwv--ggKvDgDagQW  
 PhaC\_P8N7 lAaPaasvKiThyf---QGplRFVLagSGhIAGVINPPEaQKqyqWT--NDgkaetLDQf  
 PhaC\_P2N8 lAaPwrsvYagaRlp---gGKtRFVLsgSGhIAGINPPAahKyqHWT--cDsLEtspDEW

PhaC2<sub>16</sub> -----WariSAWivgqaa-----  
 PhaC<sub>50</sub> -----WariSAWivgqg-----  
 PhaC\_P2N10\* -----fAGR-----hglaiVpPAisRflTAtsiKKpr  
 PhaC1<sub>16</sub> LehsKattGSWWemWikWaserhGpkkPA--PKApGs-aRfpSigaAPGdYVra-----  
 PhaC1<sub>50</sub> LeqsKptiGSWWdlwvkwWasqrsGakrPA--PKApGs-aRfppIgaAPGdYVrt-----  
 PhaC5 lqeAtkhtGtWwvvdWagkrsGRgkLA--PKAlGN-atYKArEkAPGTYVmerA-----  
 PhaC20 aAgAtphTGSWWehWtdWLatrsGerkaA--PKSlGs-ERHqplaaAPGTYVhg-----  
 PhaC10\* -----  
 PhaC2<sub>1</sub> yydAKVvdGSWWTqWlgWiQersGalKet--hmAlGN-QnYppmEaAPGTYVrvr-----  
 PhaC7\* -----  
 PhaC\_P11N2 LeTAsEvsGSWWplWaeWlGgfgGKkVtA--rrrlGs-adsfplEPAPGRYVKeKA-----  
 PhaC25 lAgAtEqPGSWWTDWAcqWlKgHAGKqVPA--PKAYGdGKKYKAIEPAPGRYVKArA-----  
 PhaC\_P1N3 lAgAtEhPGSWWTDWsnWlKtHAGKqIPA--PKSYGkGsaYKAIEsAPGRYVKArA-----  
 PhaC14 fVSAterPGSWWpDWSAWLkagGAmIaA--PKgYGN-KtFKAIEPAPGRYVKqKA-----  
 PhaC8 MASAIekPGSWSDWSAWLktqGpMvAa--PKgYGN-KKlKAIEPAPGRYVKqKA-----  
 PhaC23 MAgAiEkPGSWSDWSAWLktqGpMvAa--PKgYGN-KmlKAIEPAPGRYVKqKA-----  
 PhaC21 MASAtEkPGSWSDWSAWLktqGpMvAa--PKgYGN-KKlKAIEPAPGRYVKqKA-----  
 PhaC4 lAgAtEsPGSWWTDWAAWlLaplsGKeIaA--PKAlGs-RKYKSIEPAPGRYVKqKA-----  
 PhaC\_P4N10 lAgAtEsPGSWWTDWAAWlLaplsGKeIaA--PKAlGs-RKYKSIEPAPGRYVKqKA-----  
 PhaC19 LdSAKEvPGSWWTDWAWLkPHAGKqVPA--PKtYGN-KsHKvIEPAPGRYVKAKA-----  
 PhaC6 LdSAKEvPGSWWTDWAWLkPHAGKqVPA--PKtYGN-KsHKvIEPAPGRYVKAKA-----  
 PhaC3 LdSAKEvPGSWWTDWAWLkPHAGKqVPA--PKtYGN-KsHKvIEPAPGRYVKAKA-----  
 PhaC51 LeSAKdvPGSWSDWAAWlKPHAGKMVPA--PKAYGd-RsHKAIEaAPGRYVKAKA-----  
 PhaC27 LeSAKdvPGSWSDWAAWlKPHAGKMVPA--PKAYGd-RsHKAIEaAPGRYVKAKA-----  
 PhaC18 LeSAKdvPGSWSDWAAWlKPHAGKMVPA--PKAYGd-RsHKAIEaAPGRYVKAKA-----  
 PhaC\_P8N7 vAgAtEhkGSWWpDwieWigaqDGKRVPAkgarvpgK-gKlKAlEnAPGsYVKAr-----  
 PhaC\_P2N8 qAgAaahaGSWWpDWkfwLgrrAGgkVmA---rtPgS-gglTAlEdAPGsYVrmtshQE--

## Supplementary 3

A.

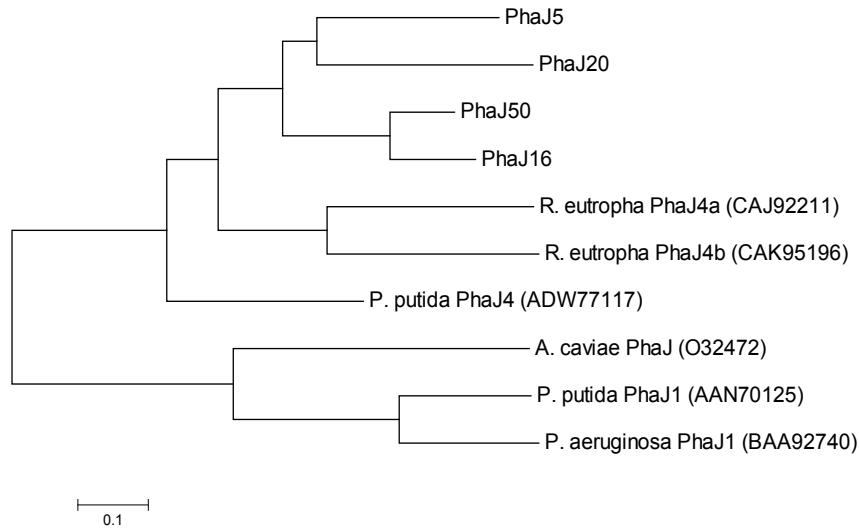

B.

|                     | 39                                                             | 44 |
|---------------------|----------------------------------------------------------------|----|
| R. eutropha PhaJ4a  | -MrtiaSLeeLEglqGQEvavSDWIEvtQqqvngFAdaTGDhQWIHIDVERAKKESPyGG   |    |
| R. eutropha PhaJ4b  | -MktyeNiadLQplVGeVIGtSEWLaLDQARIntFAdaTGDhQWIHVdVERAKn-gPFGa   |    |
| P. putida PhaJ4     | --mphvpvteLSqyVGkELGhSEWLKIDQqRInlFAeaTGFQfIHVDpEKAAK-tPFGG    |    |
| PhaJ20              | mteEaySvrtIpqfaGrELGvSDWLRIDQeRIdrFAACTdDrQWIHVdVERAeRESpFGt   |    |
| PhaJ50              | --mstlkMatltekVGOELGttrWvaLDQSRIQaFAdCTGdQWIIHtDVERAKKESpFGG   |    |
| PhaJ16              | --msaltMqnIaakIGeELGvtgWttLDQARIQaFAdCTGdQWIIHtDVERArKESpFGG   |    |
| PhaJ5               | -MadaltLatIEsfVGrELGeSgWvRmDQqRIdaFAeCTGDrQWIHVdVERAAREgPFGG   |    |
| A. caviae PhaJ      | -----MsaqsleVGQkarlSk--RfgaAevaaFAalseDfnplHlDpafAAt-taFer     |    |
| P. putida PhaJ1     | -MsQvtNtpyealeVGQkaeyk--sVEerdIqlFAAmsGdhnpvHlDaEfAAK-SmFre    |    |
| P. aeruginosa PhaJ1 | -MsQvqNipyaEleVGQkaeyts--sIaerdIqlFAAvsGDrnpvHlDaayAAt-tqFke   |    |
|                     | <b>71</b>                                                      |    |
| R. eutropha PhaJ4a  | PIAHGfLTLSSLIPkfmhNalhmPskI--GVNYGLnRVRfTAPVpVGSklRaRIKLLkver  |    |
| R. eutropha PhaJ4b  | PIAHGfLTLSSLIPafthsayriRns-stGVNYGLDKVRFpAPVpVdSllRaqfKLMsYea  |    |
| P. putida PhaJ4     | tIAHGfLTLSSLIPkIIElIvIlfqgkMvVNYGLDsVRFiqPVKvDsrVrIkVKLgEvve   |    |
| PhaJ20              | tvAHGLlvLSSLlPrfgfEVglvPpgVssalNYGfDgVRFvSPVKaGARvRDRvtLLeatd  |    |
| PhaJ50              | PvAHGMLTLSSLIPmwlfDLpaaPddagailNYGfDKVRFIAPVKsGAKvRaRIKLLAatP  |    |
| PhaJ16              | PvAHGMLTLSSLIPpwlfELpaaPldagailNYGfDKVRFIAPVKaGsrVRgRIKLLAaaP  |    |
| PhaJ5               | tIAHGfLTLSSiigpaqlDVwiaPagiGtaVhYGLDKVRFIAPVpaGrnVRtRIKLLaAvea |    |
| A. caviae PhaJ      | PivHGML-LSLfsgllgqqlpgkgsIyLG-----qslsFklPVfVGdeVtaeVevtAlre   |    |
| P. putida PhaJ1     | rIAHGmfsgaLisaaactlpgPgtIyLG-----qQmsFqkPVKIGdtltvRleiLeKlP    |    |
| P. aeruginosa PhaJ1 | rIAHGMLsgaLisaaiaatVlpgPgtIyLG-----qt1RFtrPVKLGddlkvelevLeKlP  |    |
| R. eutropha PhaJ4a  | ldplpkSpeLvgaqsTwevTVEREGsdrPvcVAESItrryg-----                 |    |
| R. eutropha PhaJ4b  | len-----GgaqFkvemmVERQGGSKPvcIAESILrrfP-----                   |    |
| P. putida PhaJ4     | Kkp-----GqwllkaiaTlEIEGEGEKPAyIAESLsLcfv-----                  |    |
| PhaJ20              | KgE-----GrllvkarhTIEIEGESKPALVAEmLamLitg-----                  |    |
| PhaJ50              | KeK-----GrvllTqeyTVEIEnEtKPALIAELLVmlIPkaa-----                |    |
| PhaJ16              | KdK-----GrlllTqeyTVEIEnEtKPALIAELLVmlvPka-----                 |    |
| PhaJ5               | Kgs-----GrtLvTtenvVEIEGhKPALIAAtaLaMiMP-----                   |    |
| A. caviae PhaJ      | dkp---iatLtrtIFTqggalaVtGE-----VVkLP-----                      |    |
| P. putida PhaJ1     | KfK----vRiatnVYngndelvVaGEAEilaprkkqtVeLvspPnfvas              |    |
| P. aeruginosa PhaJ1 | KnR----vRmatrVFngagkqvVDGEAEimapeEkLsVeLaelPpisig              |    |

## Supplementary 4
